# Supplementary material for: A Novel Azaphilone Muyophilone A From the Endophytic Fungus Muyocopron laterale 0307-2
Source: Front Chem. 2021 Aug 24;9:734822. doi: 10.3389/fchem.2021.734822 (PMC8417894; doi:10.3389/fchem.2021.734822)
Supplement: Supplementary file 1 [file Table1.DOCX]

**SUPPLEMENTARY MATERIAL**

**A Novel Azaphilone Muyophilone A from the Endophytic Fungus *Muyocopron laterale* 0307-2**

Chao Yuan*§,1*, Yuhua Guo*§,2*, Ke Wang*3*, Zhunian Wang*1*, Longfei Li*4**, Huajie Zhu*4**, and Gang Li*3**

*1Tropical Crops Genetic Resources Institute, Chinese Academy of Tropical Agricultural Sciences CATAS, Haikou 571101, People's Republic of China, 2Haikou Experimental Station, Chinese Academy of Tropical Agricultural Sciences CATAS, Haikou 571101, People's Republic of China, 3Department of Natural Medicinal Chemistry and Pharmacognosy, School of Pharmacy, Qingdao University, Qingdao 266071, People’s Republic of China, 4College of Pharmacy, Hebei University, Baoding 071002, Hebei, People’s Republic of China*

§CY and YHG contributed equally to this work.

Correspondence authors:

lilongfei@hbu.edu.cn; zhuhuajie@hotmail.com; gang.li@qdu.edu.cn

| **Table of Contents** | **Pages** |
| --- | --- |
| **Experimental section** | **3** |
| **General Experimental Procedures.** | **3** |
| **Fungal Material.** | **3** |
| **Extraction and Isolation.** | **4** |
| **X-ray Diffraction Crystallographic Analysis of Austdiol (2).** | **5** |
| **Biological Assay.** | **5** |
| **Figure S1.** Representative azaphilone dimers or trimers from fungi. | **6** |
| **Figure S2.** 1H (500 MHz) and 13C (125 MHz) NMR spectra of compound **1** (CD3OD). | **7** |
| **Figure S3.** 1H (500 MHz) and 13C (125 MHz) NMR spectra of compound **2** (DMSO-*d*6). | **8** |
| **Figure S4.** Experimental and calculated ECD spectra of compound **2**. | **9** |
| **Figure S5.** X-ray diffraction of compound **2**. | **10** |
| **Figure S6.** 1H NMR spectrum of compound **3** (500 MHz, CD3OD). | **11** |
| **Figure S7.** 13C NMR spectrum of compound **3** (125 MHz, CD3OD). | **12** |
| **Figure S8.** HSQC spectrum of compound **3** (500 MHz, CD3OD). | **13** |
| **Figure S9.** HMBC spectrum of compound **3** (500 MHz, CD3OD). | **14** |
| **Figure S10.** ROESY spectrum of compound **3** (500 MHz, CD3OD). | **15** |
| **Figure S11.** IR spectrum of compound **3**. | **16** |
| **Figure S12.** Positive ESI-HRMS spectrum of compound **3**. | **17** |
| **Figure S13.** The individual ECD spectra of each conformation for (7*R*,8*S*,7'*R*,8'*S*,15*R*)-**3** at the B3LYP/6-311G(2d,p)/SMD (methanol) level. | **18** |
| **Figure S14.** The individual ECD spectra of each conformation for (7*R*,8*S*,7'*R*,8'*S*,15*S*)-**3** at the B3LYP/6-311G(2d,p)/SMD (methanol) level. | **19** |
| **Figure S15.** Fungal ITS sequence and phylogenetic tree. | **20** |
| **Figure S16.** Total conformer population of (7*R*,8*S*,7'*R*,8'*S*,15*R*)-**3**. | **21** |
| **Figure S17.** Total conformer population of (7*R*,8*S*,7'*R*,8'*S*,15*S*)-**3**. | **22** |
| **Table S1.** The calculated relative energies (△*E,* kcal/mol) at the MMFF94S level. The energy threshold is 10 kcal/mol. | **23** |
| **Table S2.** The Cartesian coordinates of conformers for (7*R*,8*S*,7'*R*,8'*S*,15*R*)-**3** and (7*R*,8*S*,7'*R*,8'*S*,15*S*)-**3** at the B3LYP-D3BJ/6-311G(2d,p) level. | **25** |
| **References** | **43** |

**Experimental section**

**General Experimental Procedures.**

Optical rotations were obtained using a JASCOP-2000 polarimeter. ESI-HRMS spectra were collected on an Agilent 6520 Q-TOF mass spectrometer. ECD spectra were recorded on an Applied Photophysics Chiral scan spectropolarimeter (experimental condition: solvent: methanol; pathlength: 1 mm).

IR and VCD spectra were measured on a BioTools ChiralIR-2X spectrophotometer (experimental condition: solvent: CDCl3; concentration: 48 mg/mL; anharmonicity factor: 1; photo elastic modulator (PEM): 0.25; spectral resolution: 4 cm-1; windows: Baf2; length of the spacer: 0.1 mm; measurement time: 12 hours).

NMR spectra were measured on a Bruker 500 MHz spectrometer. Silica gel (Qingdao Marine Chemical Factory, Qingdao, China) was used for column chromatography (CC).

The semi-preparative high performance liquid chromatography (HPLC) was performed on an Agilent 1260 system equipped with an RP-18 column (250 × 10 mm, YMC Park, 5 µm).

Thin layer chromatography (TLC) experiments were conducted with silica gel GF-254 pre-coated on glass plates (Qingdao Marine Chemical Factory, Qingdao, China). TLC spots were visualized under UV light at 254 nm and by spraying with 10% H2SO4 in alcohol followed by heating.

**Fungal Material.**

The fungal endophyte was isolated from the medicinal plant *Blumea balsamifera* collected from Danzhou, Hainan Province, People’s Republic of China. It was identified as *Muyocopron laterale* by internal transcribed spacer sequencing (Figure S14). The fungus was assigned the strain designation RO-190307-2, and was deposited at Tropical Crops Genetic Resources Institute, Chinese Academy of Tropical Agricultural Sciences CATAS, Hainan, People's Republic of China. For large-scale fermentation, the strain was cultured on potato dextrose agar for five days. Then, the fungal mycelia were inoculated in 30 flasks (500 mL) each containing 60 g rice and 80 mL distilled water. Finally, the cultures were incubated at 25 ºC for 40 days.

**Extraction and Isolation.**

The fermented material was extracted with the organic solvent ethyl acetate (EtOAc) for three times. All the organic solvent was collected and evaporated to give a crude extract (20.3 g). The extract was fractionated by CC on silica gel eluted with CH2Cl2-MeOH (100:0-0:100). The eluents were combined based on the analysis of TLC experiments, resulting in seven fractions (Fr.A-G).

Fr.B (6.2 g) from the eluent of CH2Cl2-MeOH (99:1) was separated by filtration and crystallized from MeOH to yield austdiol (**2**, purified 4.5 mg). The purity of compound **2** was confirmed by HPLC. Fr.C (3.3 g) also from CH2Cl2-MeOH (99:1) was subjected to sephadex LH-20 column chromatography eluting with MeOH to afford three subfractions (Fr.C1-C3). Purification of Fr.C3 by HPLC (MeOH-H2O, 63:37, 2.0 mL/min) yield 4,6-dimethylcurvulinic acid (**1**, *t*R=11.5min, 18.6 mg). Fr.D (8.0 g) from the eluent of CH2Cl2-MeOH (98:2) was subjected to Sephadex LH-20 column eluting with MeOH to provide two major subfractions (Fr.D1 and Fr.D2). Fr.D2 was further separated by Sephadex LH-20 (MeOH) to give one minor subfraction, which was finally purified by HPLC (MeOH-H2O, 72:28, 2.0 mL/min) to afford muyophilone A (**3**, *t*R = 17.0 min, 19.2 mg).

*Austdiol (****2****):* yellow solid; [α]20D +24.8718 (0.195 mg/mL, CHCl3), [α]20546nm +203.5898 (0.195 mg/mL, CHCl3), [α]20436nm +458.9744 (0.195 mg/mL, CHCl3), [α]20365nm +145.1282 (0.195 mg/mL, CHCl3).

*Muyophilone A (****3****):* yellow solid; [α]20D +39.4402 (0.863 mg/mL, CHCl3), [α]20546nm +144.9615 (0.863 mg/mL, CHCl3), [α]20436nm +333.8225 (0.863 mg/mL, CHCl3), [α]20365nm +86.1197 (0.863 mg/mL, CHCl3); LC-UV *λ*max (MeOH): 194, 236, 360 nm; IR *υ*max:3409.9, 2927.7, 2856.4, 1691.4, 1677.9, 1616.2, 1541.0; ECD (MeOH) *λ*: 227, 252, 316, 348, 373; 1H (500 MHz, CD3OD) and 13C (125 MHz, CD3OD) NMR data: see Table 1; ESI-HRMS *m/z*: 565.2066, [M+H]+ (calcd. for C31H33O10, *m/z* 565.2068, Δ -0.3539 ppm), *m/z* 587.1893, [M+Na]+ (calcd. for C31H32O10Na, *m/z* 587.1888, Δ 0.8515 ppm);

**X-ray Diffraction Crystallographic Analysis of Austdiol (2).**

The method was same to that previously reported.1 The Flack parameter was 0.03(15), and the absolute configuration was unambiguously assigned. Crystallographic data of austdiol (**2**) was deposited in the Cambridge Crystallographic Data Center (CCDC) with deposition numbers 2061708.

**Biological Assay.**

The antimicrobial activities of isolated compounds were evaluated by the disk diffusion method.1 Four bacteria *Staphylococcus aureus* (ATCC 6538), *Bacillus subtilis* (ATCC 9372)*, Escherichia coli* (ATCC 25922), and *Pseudomonas aeruginosa* (ATCC 27853), and one *Candida albicans* strain SC5314 were used in this study. Streptomycin and fluconazole were used as the positive controls for antibacterial test and antifungal evaluation, respectively.

**Figure S1.** Representative azaphilone dimers or trimers from fungi.

**Figure S2.**1H (500 MHz) and 13C (125 MHz) NMR spectra of compound **1** (CD3OD).


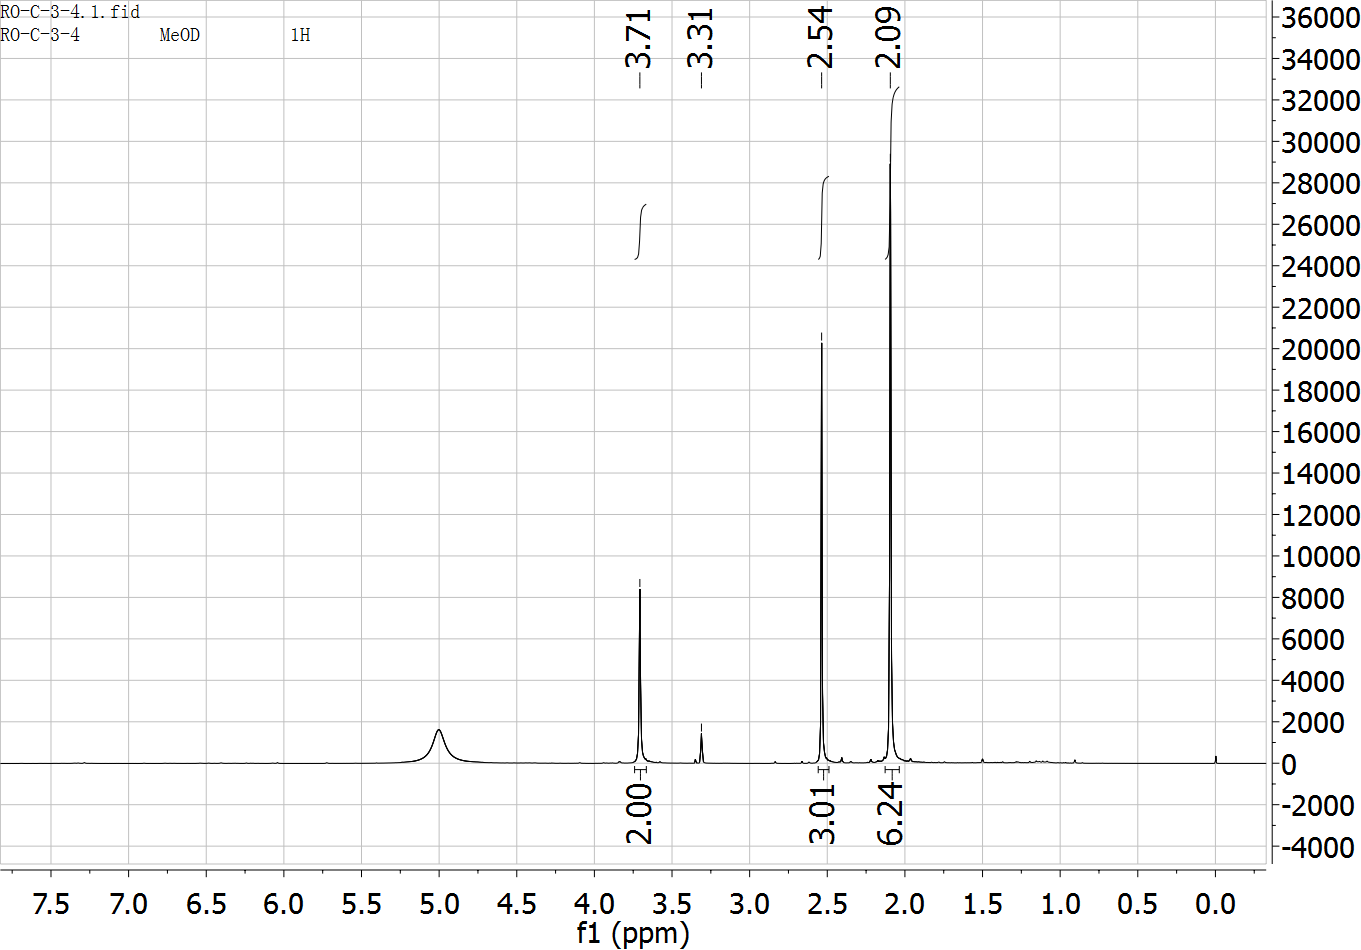


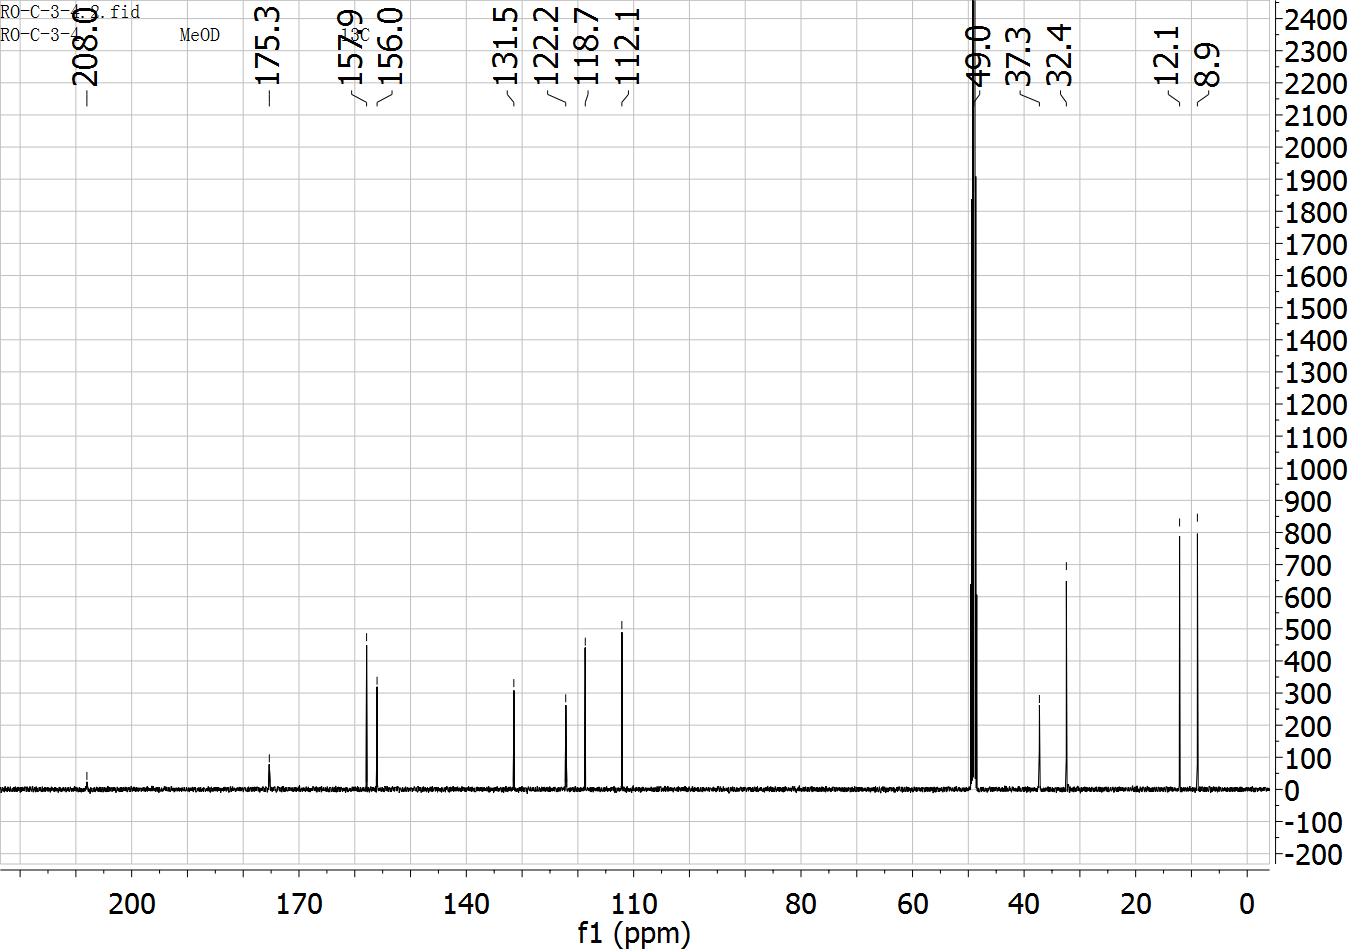


**Figure S3.**1H (500 MHz) and 13C (125 MHz) NMR spectra of compound **2** (DMSO-*d*6).


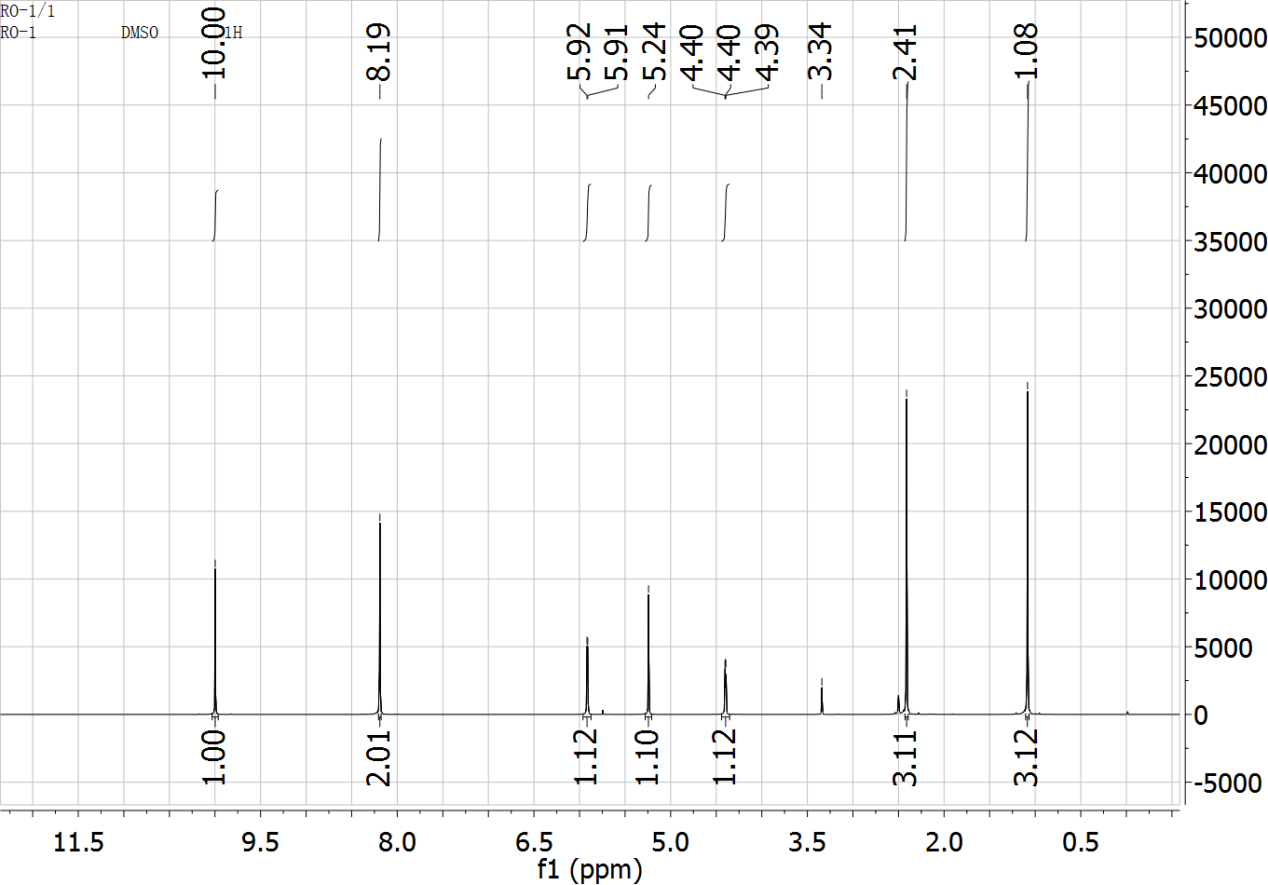


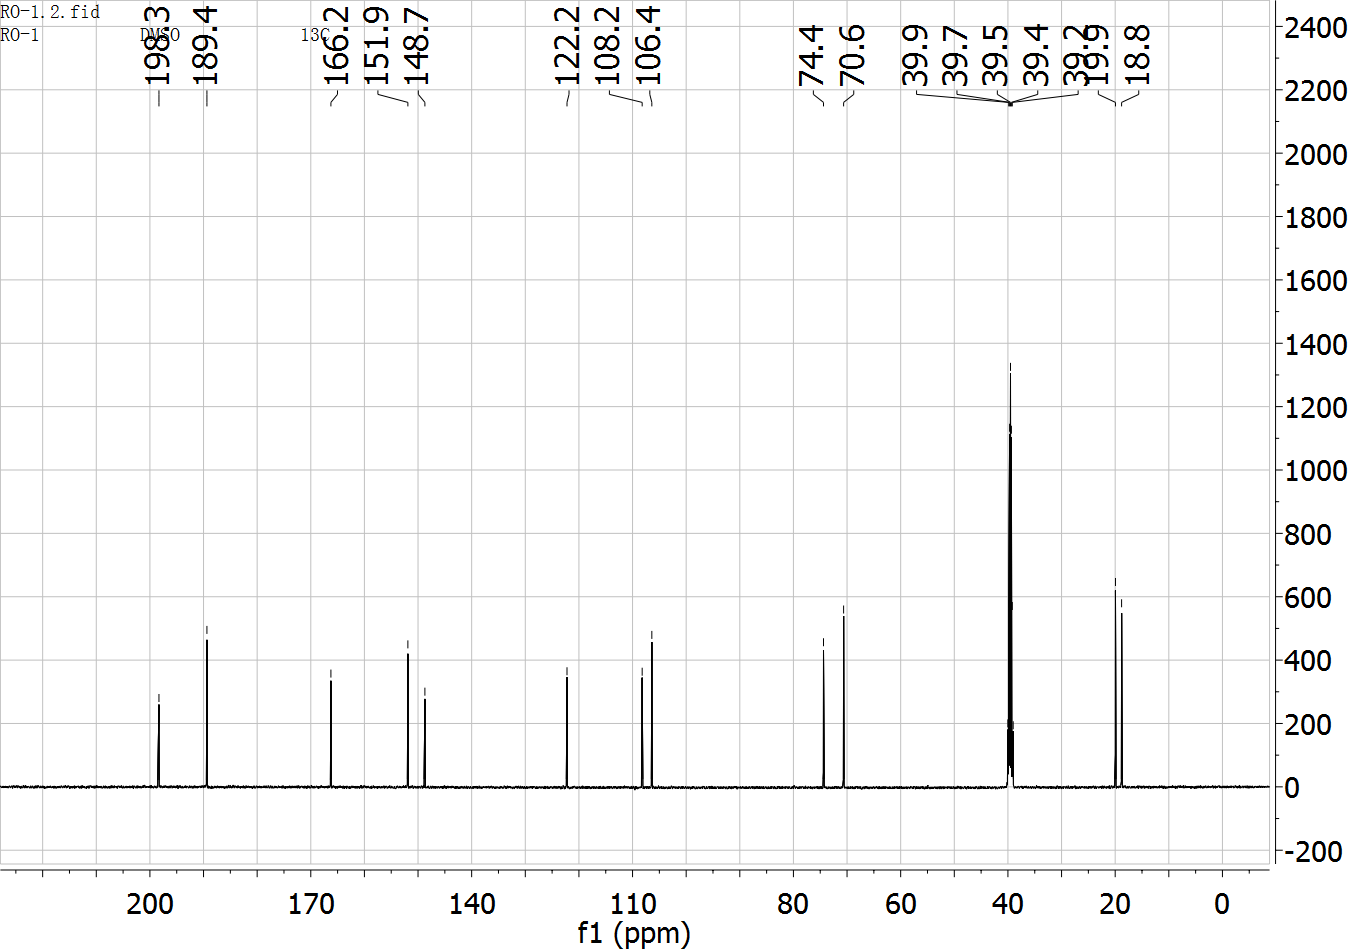


**Figure S4.** Experimental and calculated ECD spectra of compound **2**.

**Experimental ECD (0.4 mg/mL):**


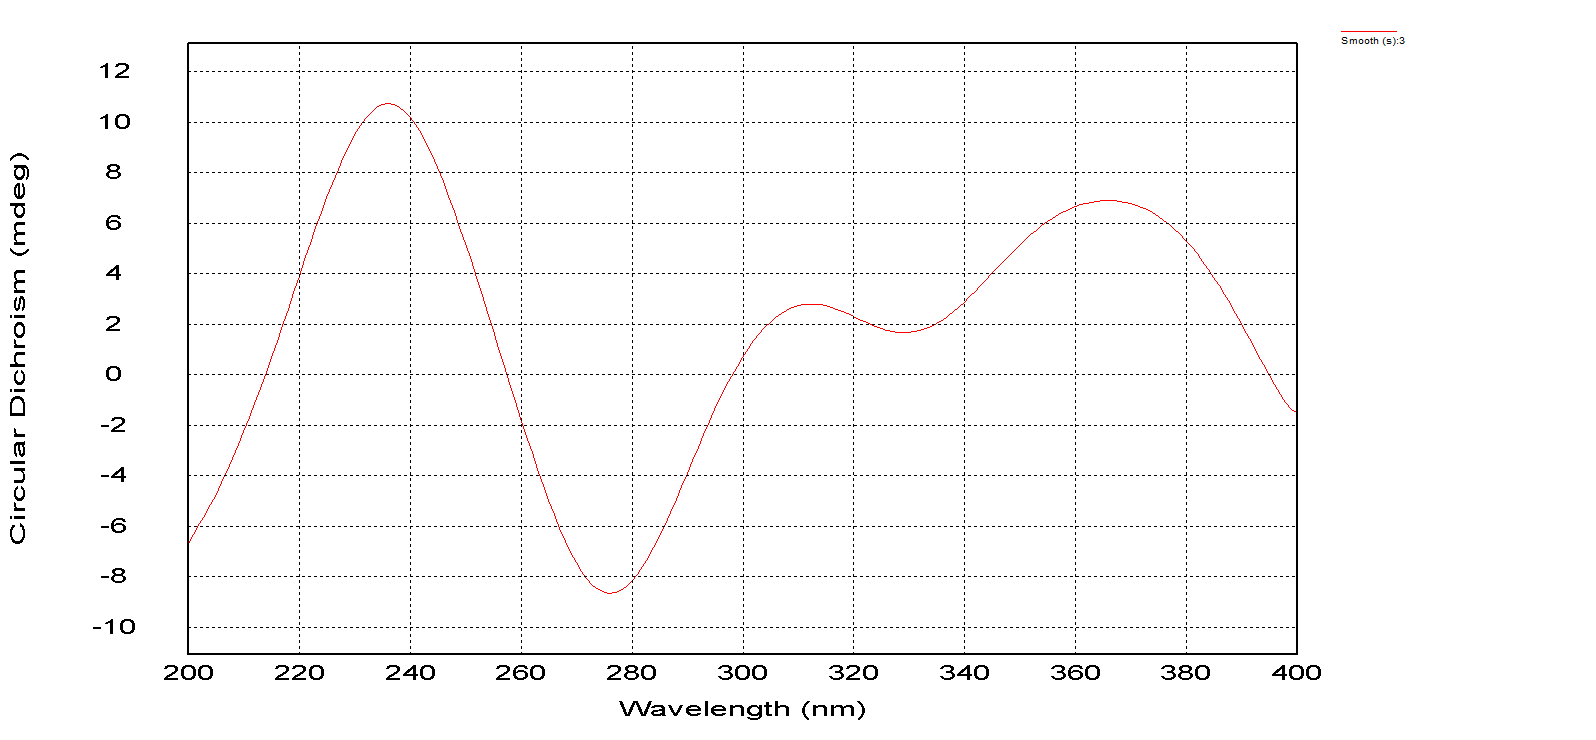


**Calculated ECD:**


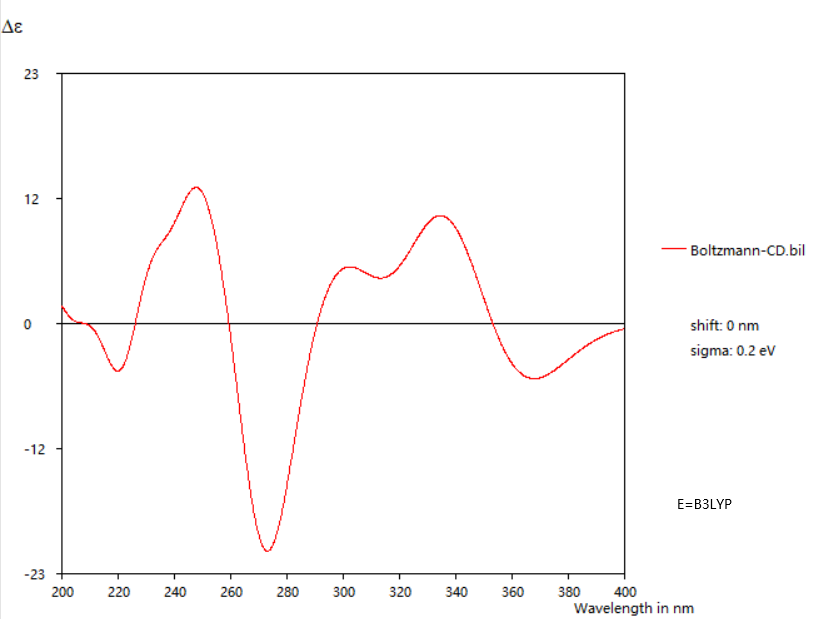


**Figure S5.** X-ray diffraction of compound **2**.


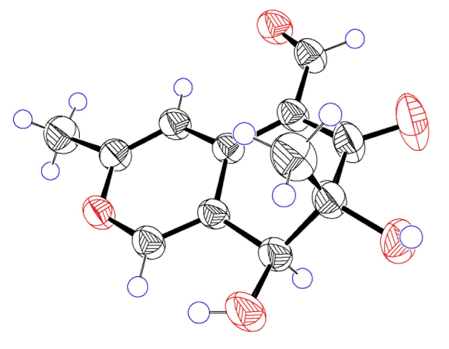


Flack parameter: 0.03(15)

**Figure S6.**1H NMR spectrum of compound **3** (500 MHz, CD3OD).


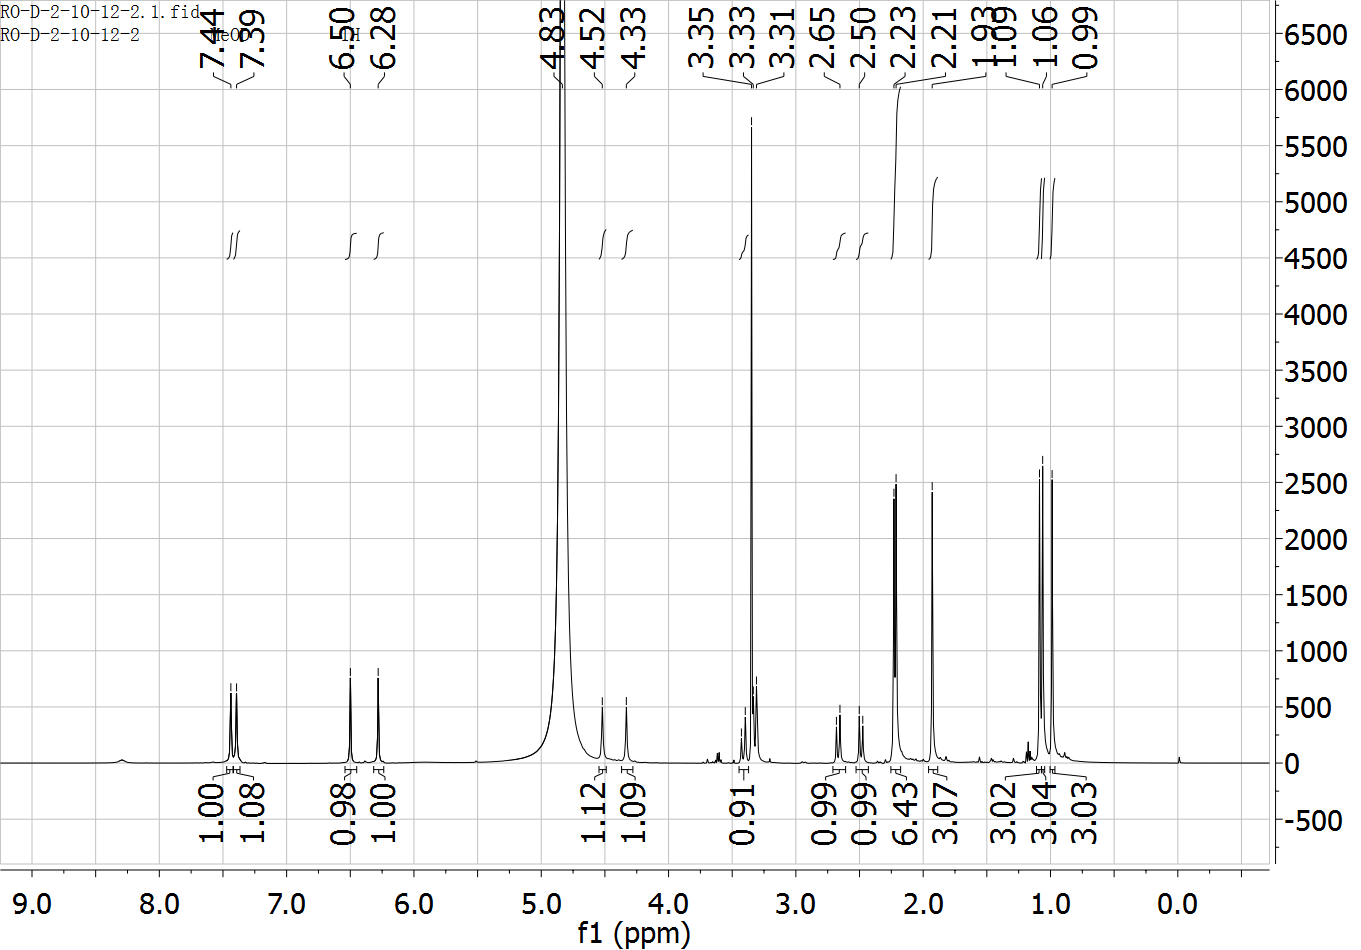


**Figure S7.**13C NMR spectrum of compound **3** (125 MHz, CD3OD).


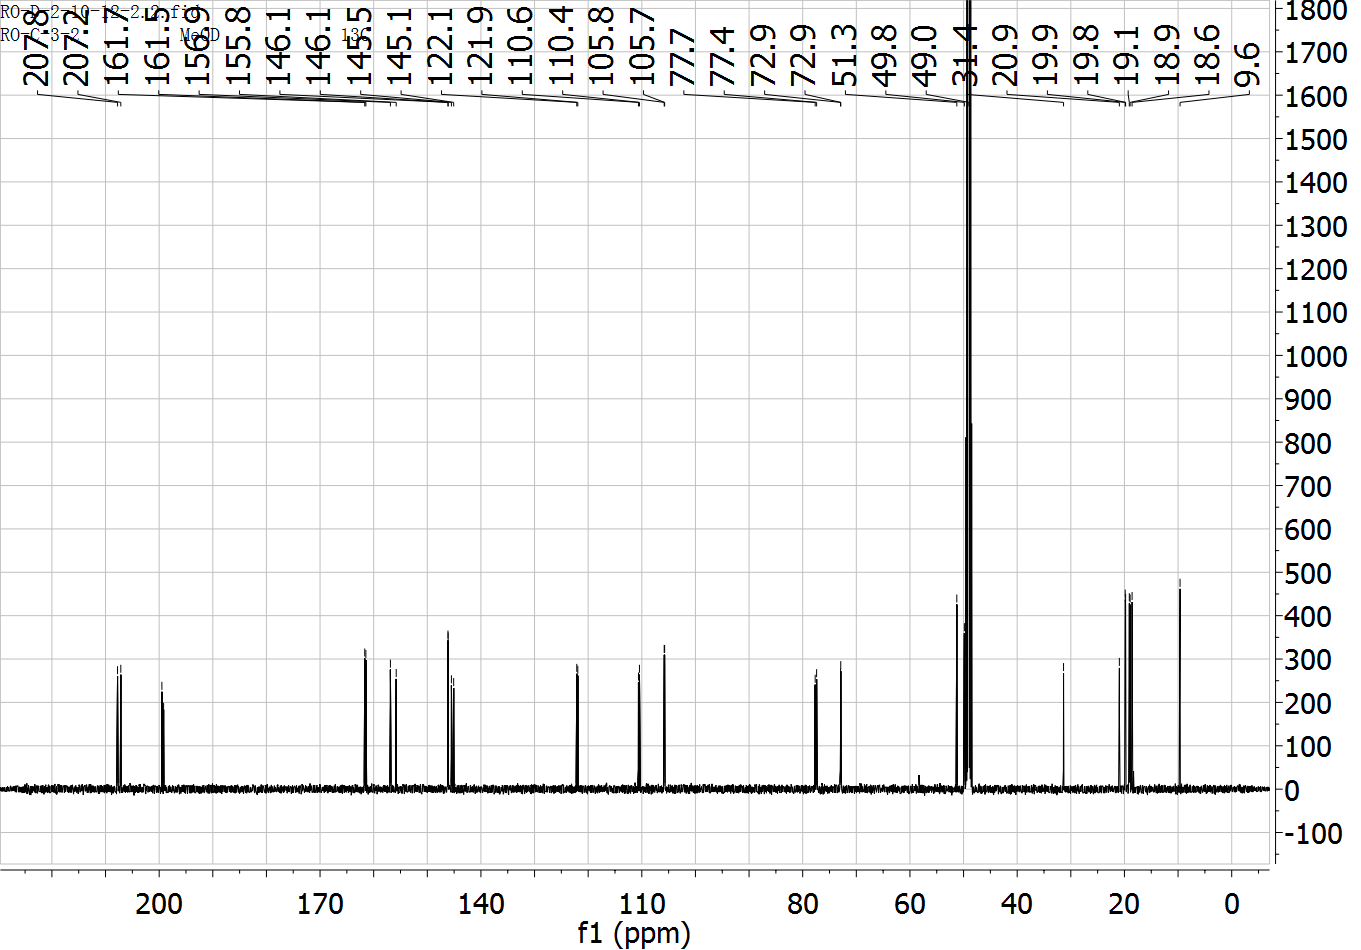


**Figure S8.** HSQC spectrum of compound **3** (500 MHz, CD3OD).


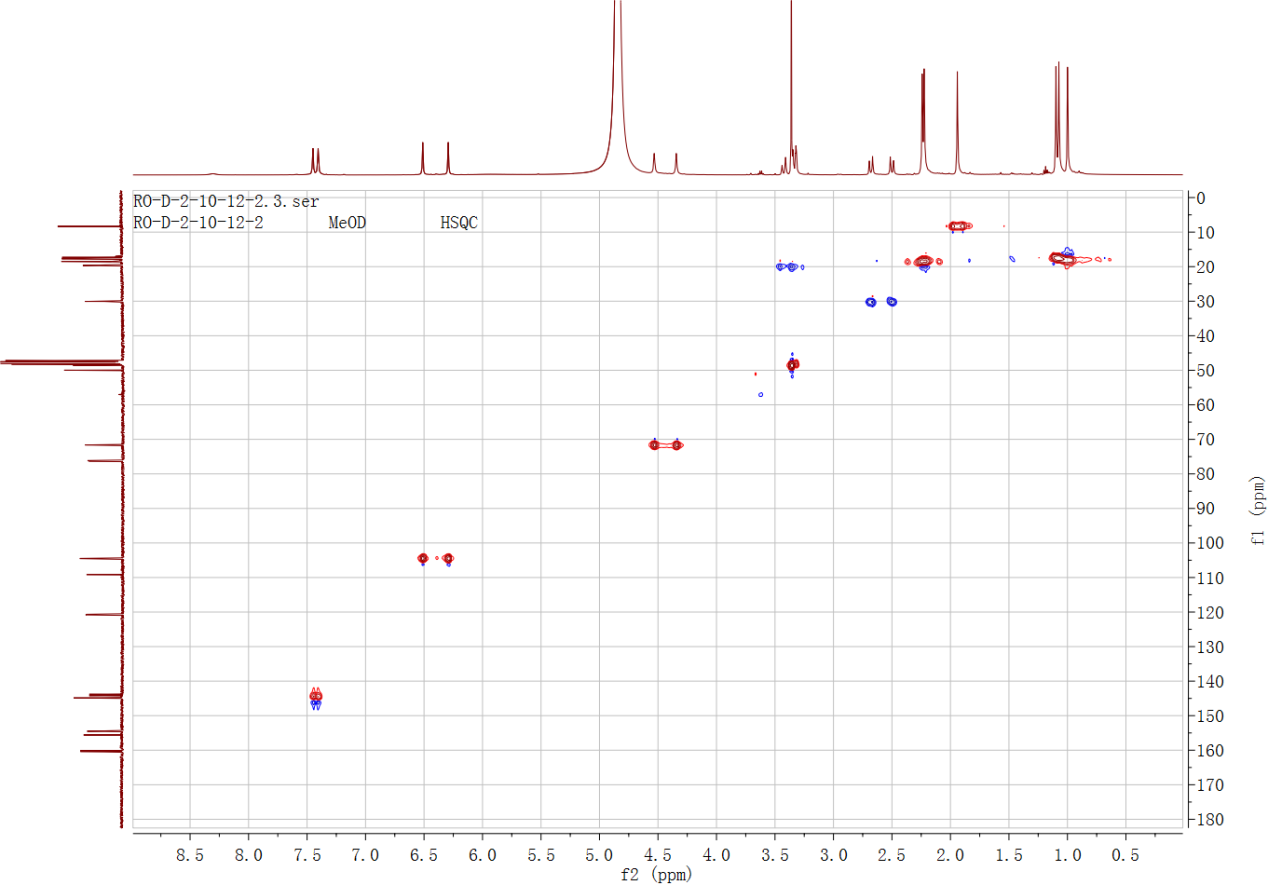


**Figure S9.** HMBC spectrum of compound **3** (500 MHz, CD3OD).


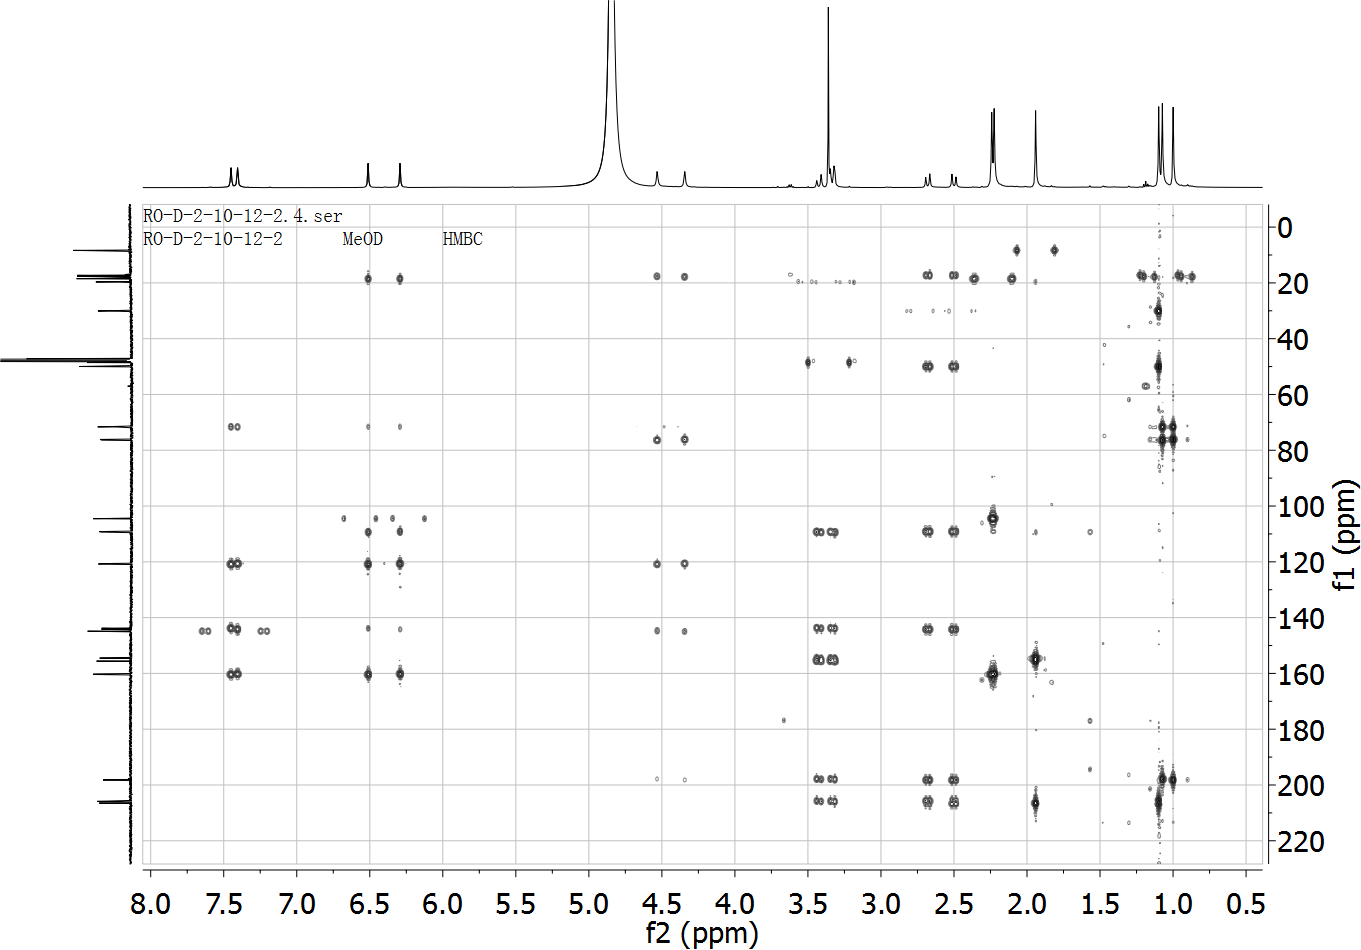


**Figure S10.** ROESY spectrum of compound **3** (500 MHz, CD3OD).


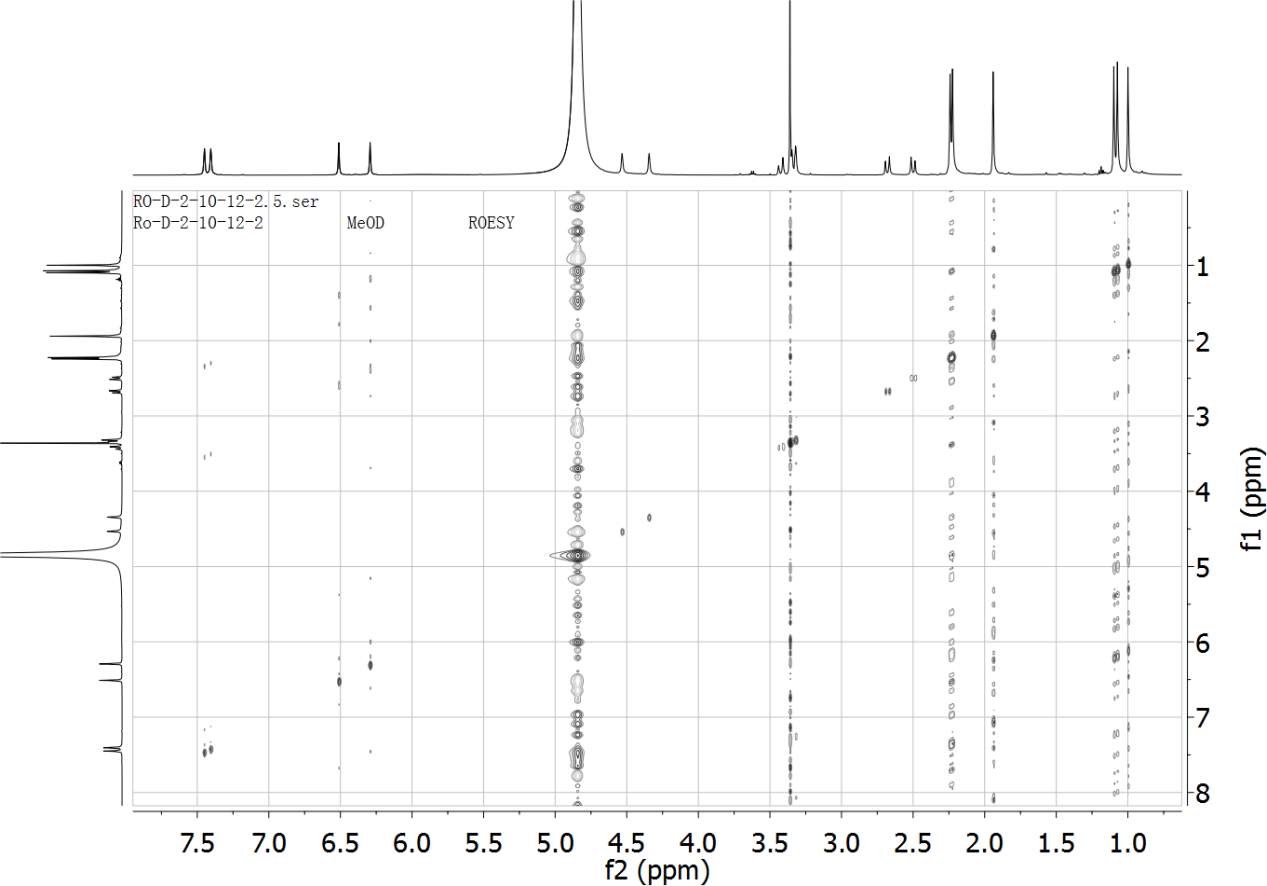


**Figure S11.** IR spectrum of compound **3**.

**
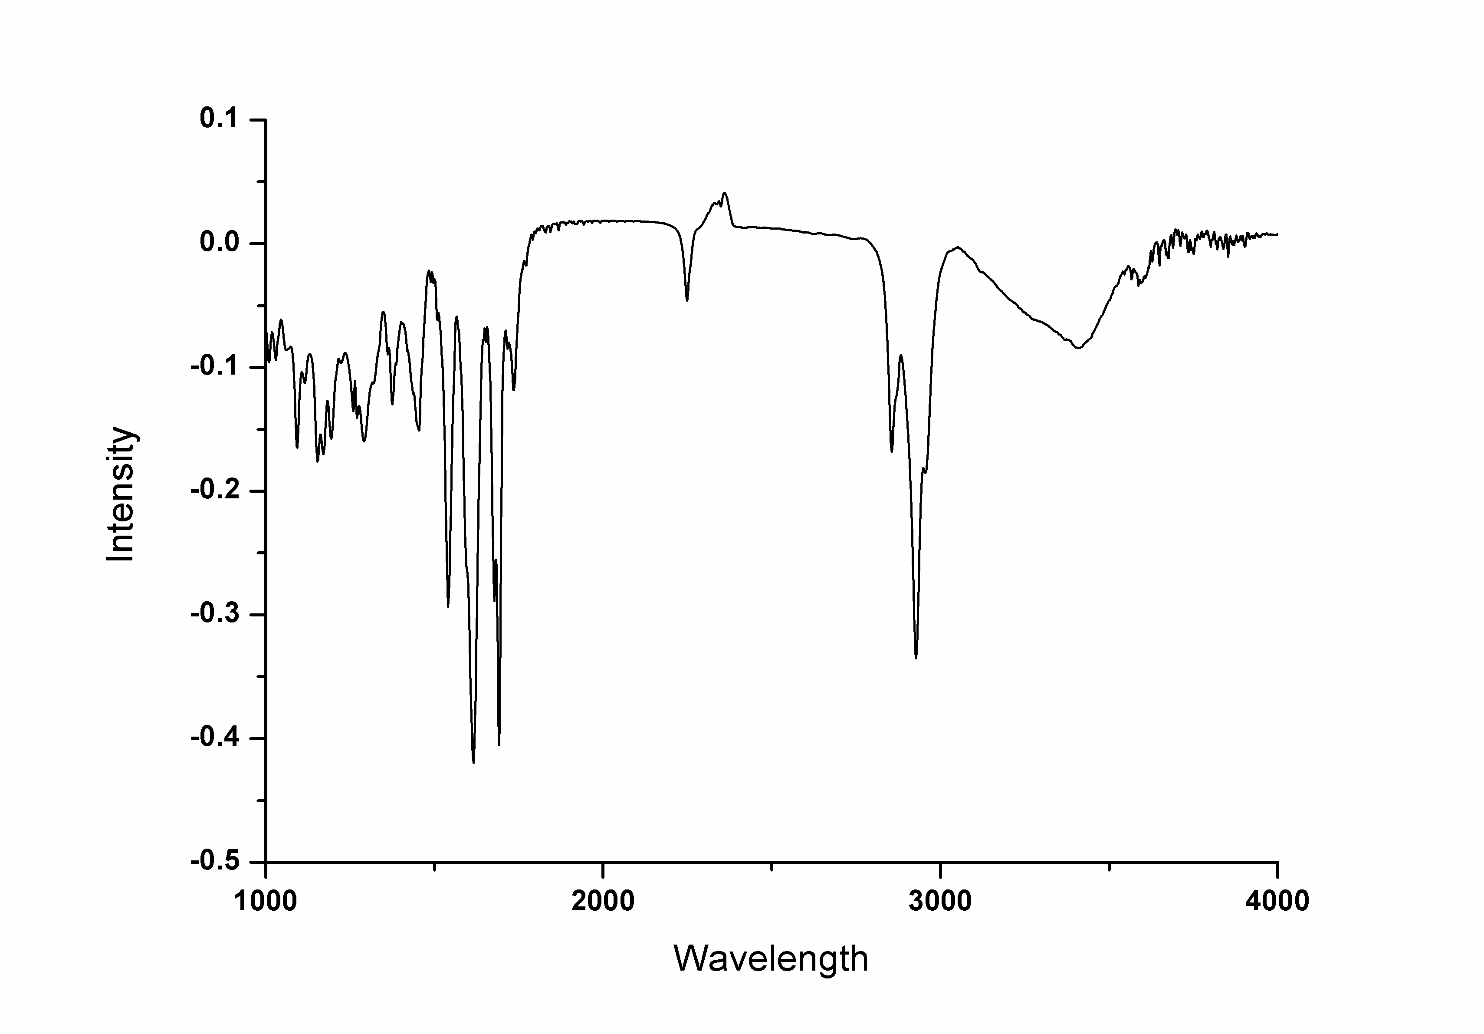
**

**Figure S12.** Positive ESI-HRMS spectrum of compound **3**.


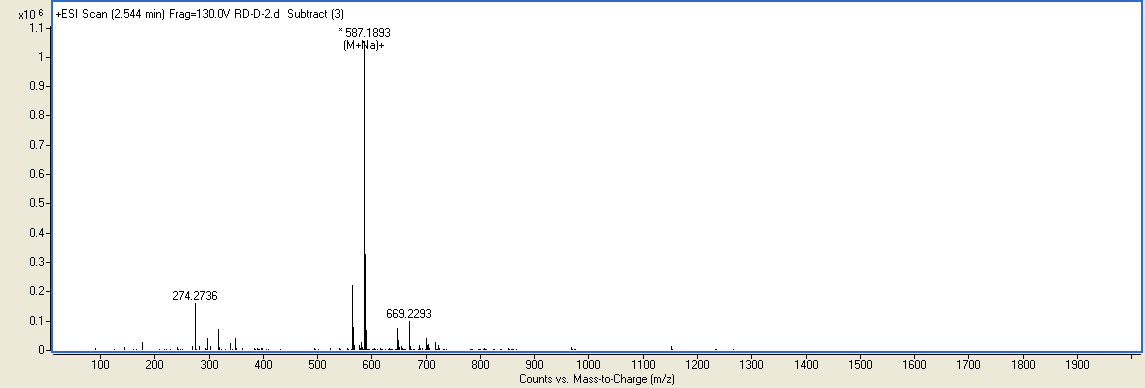


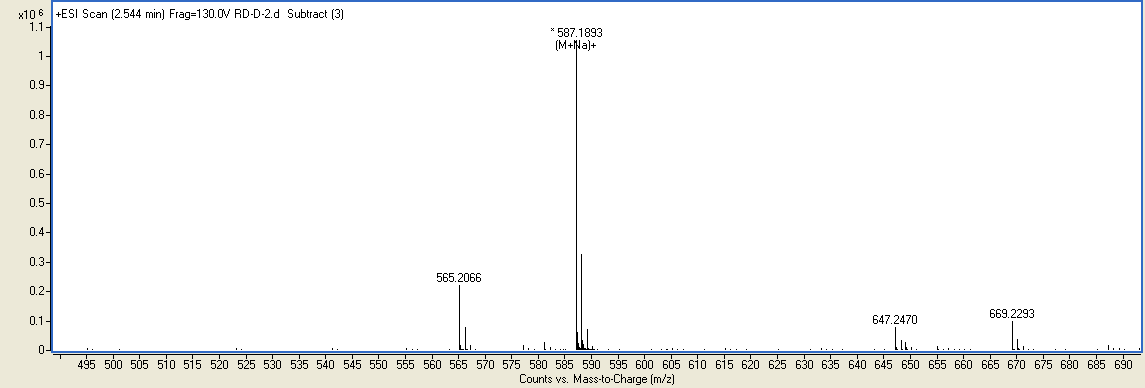


*m/z* 565.2066, [M+H]+; calcd. for C31H33O10, *m/z* 565.2068, Δ -0.3539 ppm

*m/z* 587.1893, [M+Na]+; calcd. for C31H32O10Na, *m/z* 587.1888, Δ 0.8515 ppm

**Figure S13.** The individual ECD spectra of each conformation for (7*R*,8*S*,7'*R*,8'*S*,15*R*)-**3** at the TDDFT-B3LYP/6-311G(2d,p)/SMD (methanol) level.


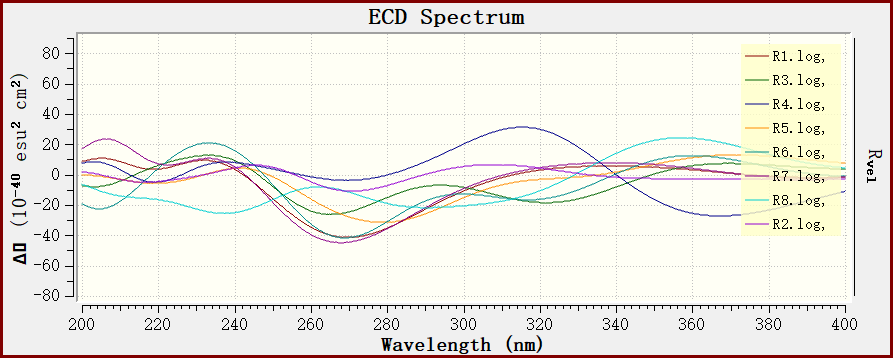


**Figure S14.** The individual ECD spectra of each conformation for (7*R*,8*S*,7'*R*,8'*S*,15*S*)-**3** at the TDDFT-B3LYP/6-311G(2d,p)/SMD(methanol) level.


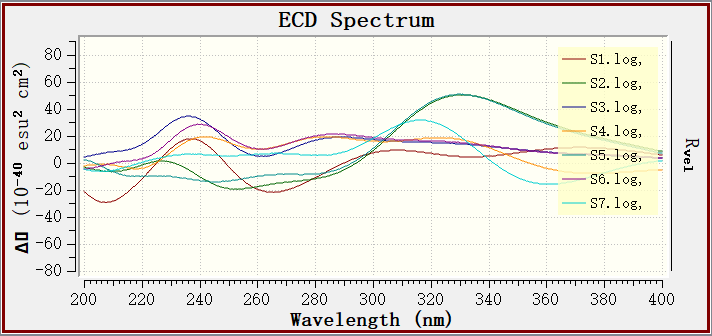


**Figure S15.** Fungal ITS sequence and phylogenetic tree.

ITS sequence:

ccgtaggtgaacctgcggaaggatcattacaagttgaaacggttgccctcgcggtgaccggttcttcaaacctctgcgtaccaaacctttcagttgcctccggcggccctgggccgacgcggcgcgcgacctccccttcgcgggggggccgctcctcgcggcggaccacccgccgggcggtcataaacaaaacctttttgtcgagatggcatcgtctaatttcttcataacaaaatatgaaatacaacttttaacaatggatctcttggctccggcatcgatgaagaacgcagcgaaatgcgataactagtgtgaattgcagatttcagtgaatcatcgagtctttgaacgcacattgcgcctcttggtattcctcgaggcatgcctgttcgagcgtcgttacgcccctcaagcgcaagcttggtgttggggatcgcccctgagatacggcggcggcccttaaatgcatcggcggtgctggtgtcagcccggagcgcagcagacatgcggcttccaggcgaccacgcgcccgccggacaacgacccgactttcaaacgtcgacctcggatcaggtagggatacccgctgaacttaagcatatcaataa

Phylogenetic tree:

**

**

**Figure S16.** Total conformer population of (7*R*,8*S*,7'*R*,8'*S*,15*R*)-**3**. The energies are computed at the B3LYP-D3BJ/6-311G(2d,p) level. P stands for the value of the conformer population.


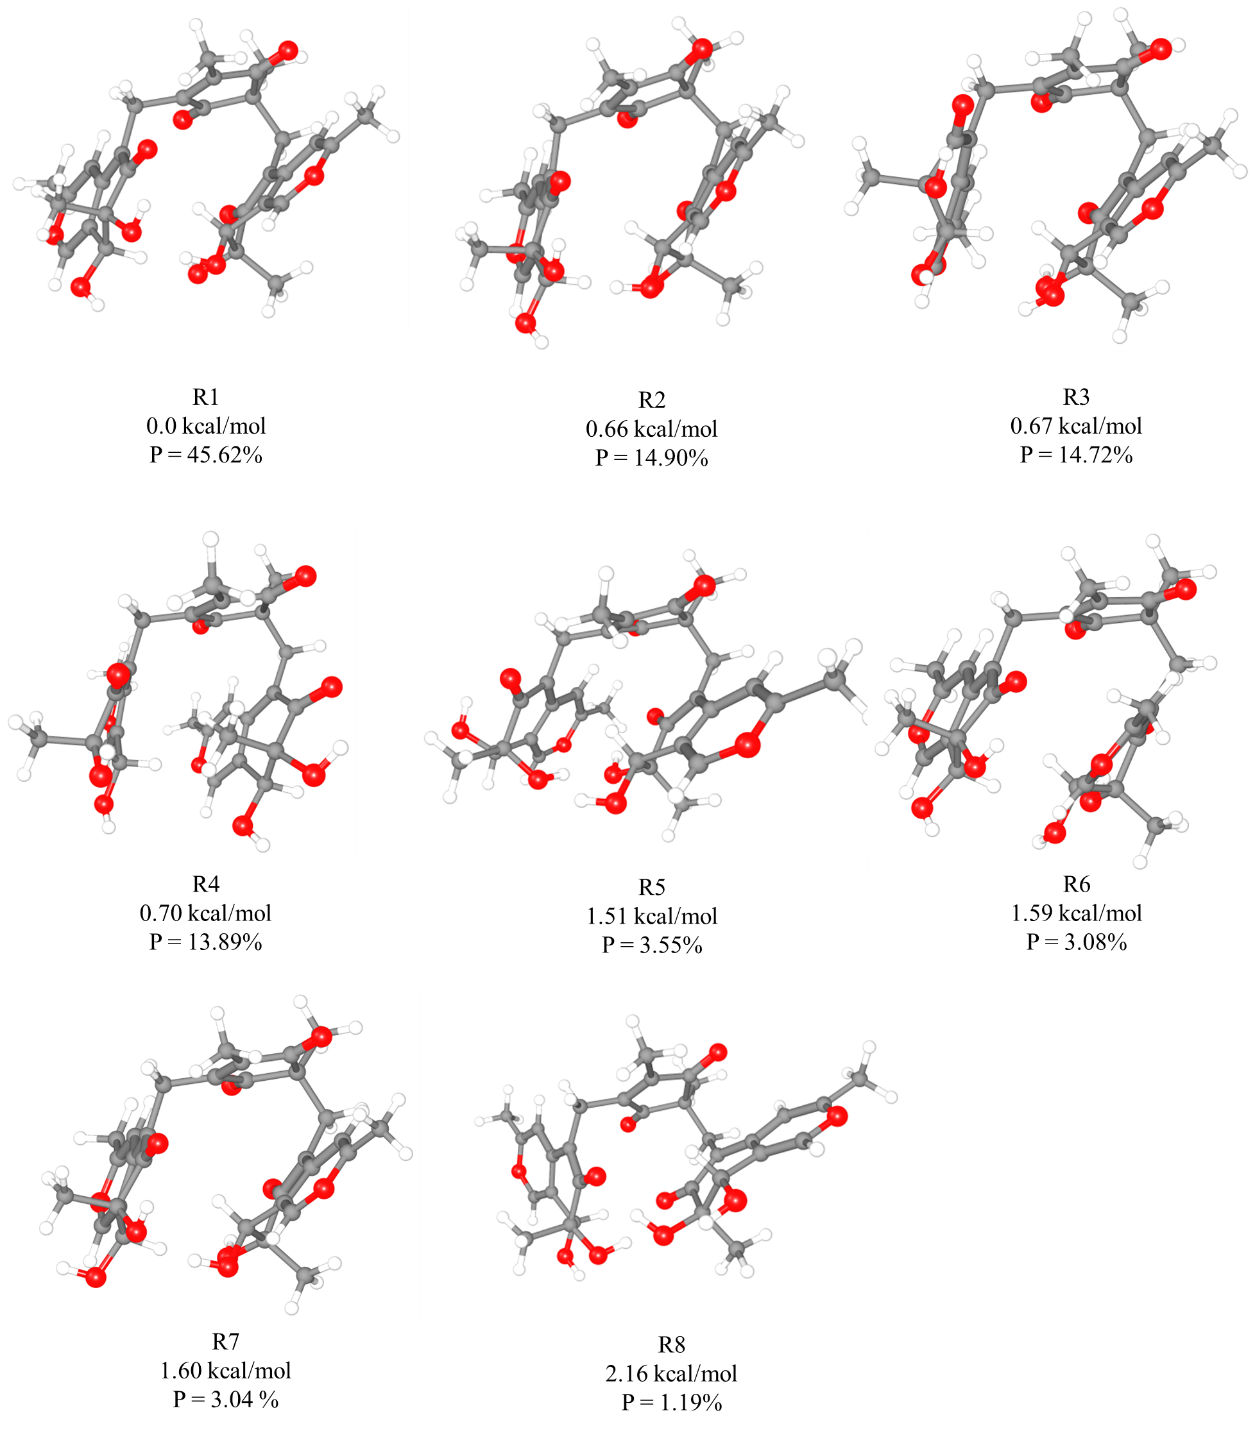


**Figure S17.** Total conformer population of (7*R*,8*S*,7'*R*,8'*S*,15*S*)-**3**. The energies are computed at the B3LYP-D3BJ/6-311G(2d,p) level. P stands for the value of the conformer population.

**
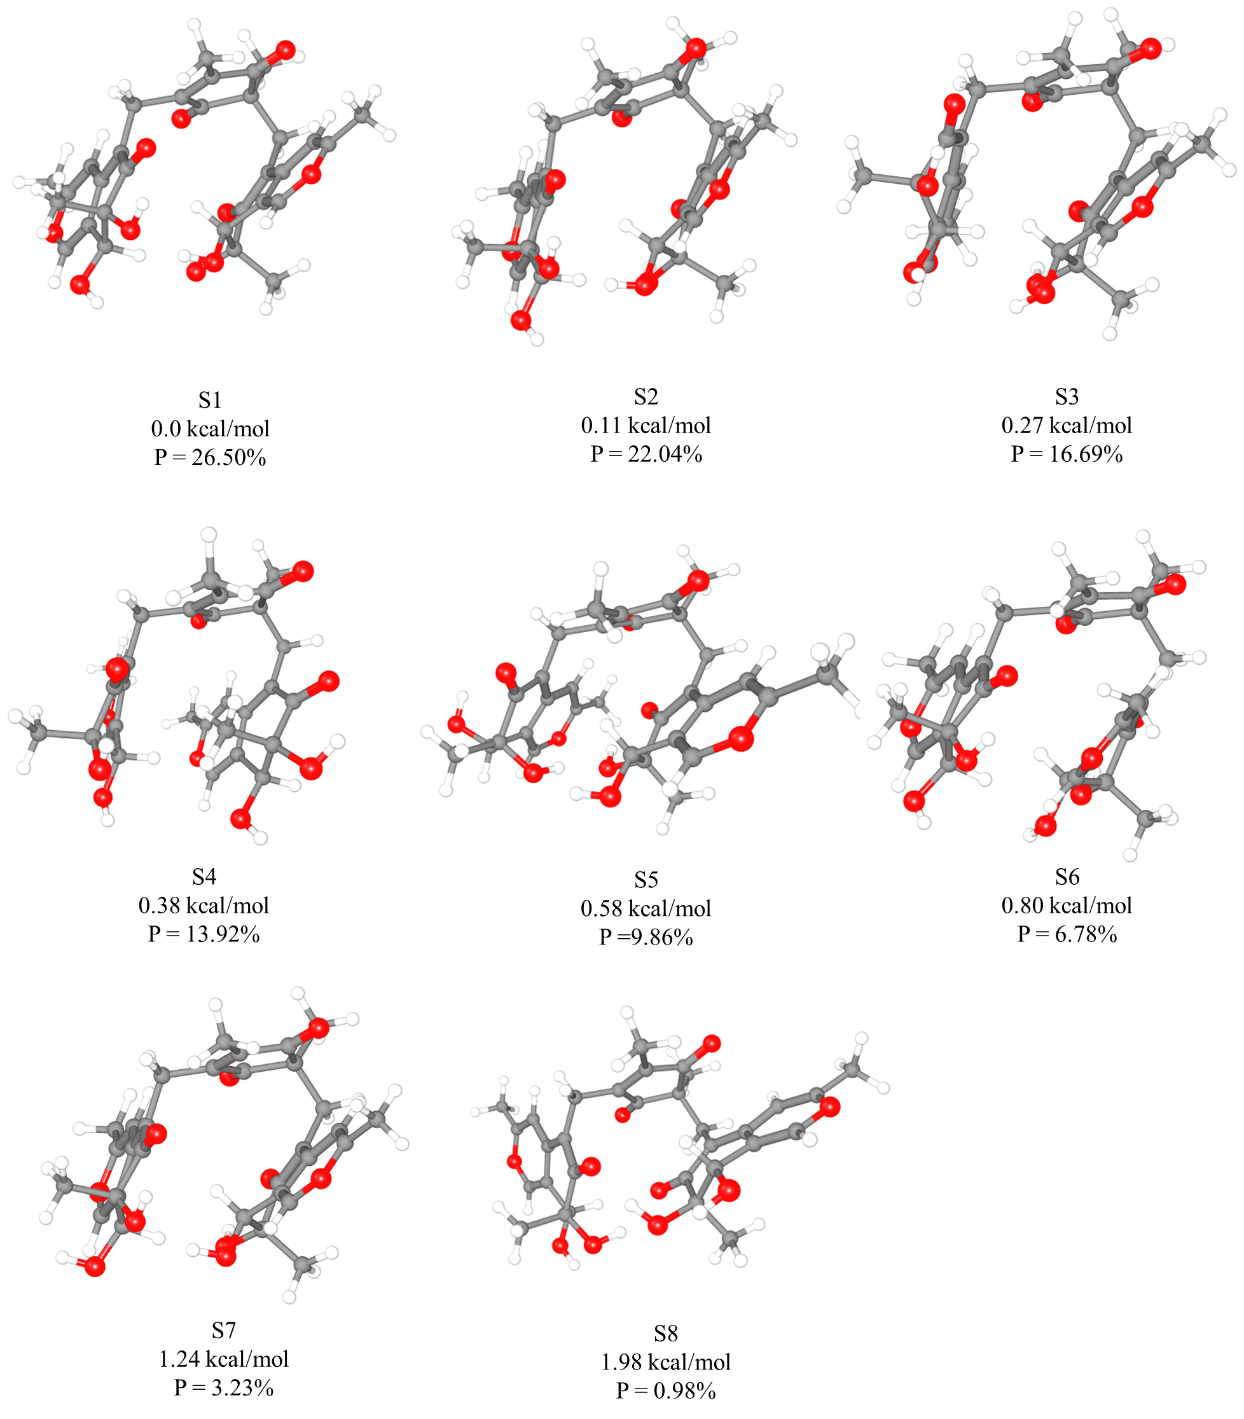
**

**Table S1.** The calculated relative energies (△*E,* kcal/mol) at the MMFF94S level. The energy threshold is 10 kcal/mol.

| **15*R*-3**  **Conformers** | **MMFF94S**  **E(kcal/mol)** |  | **15*S*-3**  **Conformers** | **MMFF94S**  **E(kcal/mol)** |
| --- | --- | --- | --- | --- |
| R_1 | 0 |  | S_1 | 0 |
| R_2 | 1.57 |  | S_2 | 0.88 |
| R_3 | 1.86 |  | S_3 | 2.09 |
| R_4 | 1.96 |  | S_4 | 2.25 |
| R_5 | 2.28 |  | S_5 | 2.84 |
| R_6 | 2.44 |  | S_6 | 2.91 |
| R_7 | 2.49 |  | S_7 | 2.96 |
| R_8 | 2.5 |  | S_8 | 3.8 |
| R_9 | 2.67 |  | S_9 | 3.87 |
| R_10 | 2.77 |  | S_10 | 3.88 |
| R_11 | 2.92 |  | S_11 | 4.08 |
| R_12 | 3.04 |  | S_12 | 4.52 |
| R_13 | 3.2 |  | S_13 | 4.54 |
| R_14 | 3.63 |  | S_14 | 4.57 |
| R_15 | 3.66 |  | S_15 | 4.7 |
| R_16 | 3.7 |  | S_16 | 4.88 |
| R_17 | 3.83 |  | S_17 | 4.9 |
| R_18 | 3.83 |  | S_18 | 5.06 |
| R_19 | 3.87 |  | S_19 | 5.13 |
| R_20 | 4.01 |  | S_20 | 5.44 |
| R_21 | 4.05 |  | S_21 | 5.72 |
| R_22 | 4.1 |  | S_22 | 5.83 |
| R_23 | 4.34 |  | S_23 | 5.91 |
| R_24 | 4.4 |  | S_24 | 5.98 |
| R_25 | 4.62 |  | S_25 | 6.02 |
| R_26 | 4.63 |  | S_26 | 6.17 |
| R_27 | 4.9 |  | S_27 | 6.19 |
| R_28 | 4.93 |  | S_28 | 6.21 |
| R_29 | 4.94 |  | S_29 | 6.25 |
| R_30 | 4.94 |  | S_30 | 6.33 |
| R_31 | 4.97 |  | S_31 | 6.48 |
| R_32 | 4.99 |  | S_32 | 6.61 |
| R_33 | 5.04 |  | S_33 | 6.65 |
| R_34 | 5.17 |  | S_34 | 6.77 |
| R_35 | 5.21 |  | S_35 | 6.93 |
| R_36 | 5.34 |  | S_36 | 7.09 |
| R_37 | 5.46 |  | S_37 | 7.1 |
| R_38 | 5.68 |  | S_38 | 7.16 |
| R_39 | 5.68 |  | S_39 | 7.52 |
| R_40 | 5.87 |  | S_40 | 7.57 |
| R_41 | 6.02 |  | S_41 | 7.61 |
| R_42 | 6.4 |  | S_42 | 7.87 |
| R_43 | 6.56 |  | S_43 | 7.9 |
| R_44 | 6.62 |  | S_44 | 8.23 |
| R_45 | 6.68 |  | S_45 | 8.34 |
| R_46 | 7.12 |  | S_46 | 8.44 |
| R_47 | 7.33 |  | S_47 | 8.63 |
| R_48 | 7.44 |  | S_48 | 8.67 |
| R_49 | 7.61 |  | S_49 | 8.8 |
| R_50 | 7.79 |  | S_50 | 9.06 |
| R_51 | 8.04 |  | S_51 | 9.08 |
| R_52 | 8.25 |  | S_52 | 9.27 |
| R_53 | 8.71 |  | S_53 | 9.52 |
| R_54 | 8.88 |  | S_54 | 9.59 |
| R_55 | 8.95 |  | S_55 | 9.62 |
| R_56 | 8.97 |  | S_56 | 10.27 |
| R_57 | 9.17 |  | S_57 | 10.49 |
| R_58 | 9.31 |  | S_58 | 10.54 |
| R_59 | 9.32 |  | S_59 | 10.81 |
| R_60 | 9.91 |  | S_60 | 10.97 |
| R_61 | 10.06 |  |  |  |

**Table S2.** The Cartesian coordinates of conformers for (7*R*,8*S*,7'*R*,8'*S*,15*R*)-**3** and (7*R*,8*S*,7'*R*,8'*S*,15*S*)-**3** at the B3LYP-D3BJ/6-311G(2d,p) level.

**(7*R*,8*S*,7'*R*,8'*S*,15*R*)-3:**

**R1**

----------------------------------------------------------------------------------

Coordinates (Angstroms)

X Y Z

-----------------------------------------------------------------------------------

C 4.377672000 2.073926000 0.472419000

O 5.107614000 1.000814000 0.870388000

C 4.615218000 -0.239834000 0.636420000

C 3.481893000 -0.471747000 -0.043468000

C 2.737616000 0.636405000 -0.602309000

C 3.232268000 1.928361000 -0.226077000

C 2.921248000 -1.858229000 -0.148272000

C 2.252401000 -2.062526000 -1.502195000

C 1.301421000 -0.895826000 -1.829941000

C 1.647435000 0.434786000 -1.434885000

C 4.992514000 3.357788000 0.893836000

O 0.299985000 -1.186837000 -2.498951000

O 3.940911000 -2.814015000 0.112764000

C 3.263169000 -2.203754000 -2.640019000

O 1.453713000 -3.252882000 -1.417511000

C -0.650344000 0.185824000 2.137389000

C -0.258132000 -1.302673000 2.252959000

C -0.600587000 -1.966614000 0.919313000

C -2.063315000 -1.767222000 0.638904000

C -2.625304000 -0.453649000 0.868896000

C -1.882356000 0.541266000 1.481489000

C -2.814545000 -2.738635000 0.104486000

O -4.111920000 -2.567307000 -0.257524000

C -4.661932000 -1.331631000 -0.130477000

C -3.969869000 -0.297514000 0.392303000

O 0.110838000 1.000841000 2.667139000

C -0.969612000 -1.960282000 3.436838000

O -0.215116000 -3.323394000 0.868161000

O 1.143669000 -1.360347000 2.464165000

C -6.062779000 -1.289637000 -0.621235000

C -0.446701000 1.898478000 -1.404061000

C -0.507761000 2.698606000 -0.152203000

C -1.968677000 2.842975000 0.279913000

C -2.685673000 2.302517000 -0.951763000

C -1.698747000 1.673497000 -1.863366000

C -2.328557000 4.304579000 0.542015000

O -3.876388000 2.399038000 -1.172654000

C -2.130729000 0.980577000 -3.105003000

O 0.440042000 3.228313000 0.386802000

C 0.852737000 1.559642000 -2.070475000

C -2.301646000 1.986134000 1.539921000

H 5.233141000 -1.012301000 1.065487000

H 2.676049000 2.817094000 -0.473243000

H 2.150557000 -1.930841000 0.624464000

H 5.087710000 3.390062000 1.982444000

H 5.996630000 3.455076000 0.472001000

H 4.383973000 4.197989000 0.565161000

H 3.502680000 -3.639489000 0.354766000

H 3.898482000 -1.319287000 -2.716054000

H 3.894046000 -3.071837000 -2.453539000

H 2.737615000 -2.338557000 -3.586615000

H 0.717532000 -3.078700000 -2.035363000

H -0.065520000 -1.396530000 0.154344000

H -2.459138000 -3.736282000 -0.099212000

H -4.469224000 0.655642000 0.453685000

H -0.699682000 -1.438488000 4.356341000

H -2.055212000 -1.943484000 3.330450000

H -0.640273000 -2.997387000 3.513159000

H 0.426476000 -3.411571000 0.138469000

H 1.371724000 -0.455027000 2.749011000

H -6.474449000 -0.287867000 -0.515315000

H -6.101518000 -1.581165000 -1.674308000

H -6.683994000 -1.994118000 -0.061525000

H -3.388262000 4.391225000 0.786339000

H -1.739249000 4.688028000 1.375806000

H -2.128114000 4.925260000 -0.334201000

H -3.141802000 0.590563000 -2.981527000

H -2.157467000 1.681679000 -3.946111000

H -1.448476000 0.168498000 -3.350312000

H 0.647334000 1.280298000 -3.104206000

H 1.458898000 2.467175000 -2.094183000

H -3.376117000 2.081574000 1.712777000

H -1.791086000 2.455464000 2.380681000

-----------------------------------------------------------------------------------

**R2**

----------------------------------------------------------------------------------

Coordinates (Angstroms)

X Y Z

-----------------------------------------------------------------------------------

C 0.680390000 2.626701000 -2.148315000

O 1.511094000 3.312253000 -1.316301000

C 2.309973000 2.611973000 -0.472354000

C 2.379500000 1.273613000 -0.467645000

C 1.595873000 0.500742000 -1.406664000

C 0.695019000 1.278039000 -2.207119000

C 3.182742000 0.527226000 0.549546000

C 3.878973000 -0.655906000 -0.111286000

C 2.814878000 -1.521536000 -0.810909000

C 1.721847000 -0.876465000 -1.485175000

C -0.228301000 3.528243000 -2.897256000

O 3.013856000 -2.741781000 -0.806458000

O 4.074190000 1.404116000 1.213721000

C 4.944487000 -0.232434000 -1.124614000

O 4.475164000 -1.425384000 0.924240000

C -2.850908000 1.472167000 0.122411000

C -2.197949000 2.672932000 0.829200000

C -0.725633000 2.345612000 1.040295000

C -0.579790000 1.060724000 1.792287000

C -1.482170000 -0.026757000 1.467882000

C -2.526961000 0.140266000 0.578881000

C 0.413414000 0.875515000 2.671515000

O 0.649750000 -0.308028000 3.296083000

C -0.146924000 -1.368929000 3.000531000

C -1.173166000 -1.262946000 2.131060000

O -3.675354000 1.725851000 -0.757674000

C -2.936925000 2.979743000 2.132868000

O -0.004490000 3.382675000 1.681482000

O -2.272420000 3.801157000 -0.034195000

C 0.258095000 -2.594127000 3.734264000

C -0.468415000 -2.110504000 -1.608576000

C -1.737605000 -1.361004000 -1.830513000

C -2.838694000 -1.960996000 -0.957535000

C -2.098914000 -3.113969000 -0.295919000

C -0.687358000 -3.131363000 -0.748211000

C -3.973118000 -2.509043000 -1.833028000

O -2.588914000 -3.908310000 0.482847000

C 0.235980000 -4.183154000 -0.255644000

O -1.888510000 -0.464718000 -2.634189000

C 0.802145000 -1.745236000 -2.320572000

C -3.422500000 -0.970674000 0.094202000

H 2.857521000 3.253951000 0.198130000

H -0.013869000 0.796503000 -2.861999000

H 2.480198000 0.092415000 1.274063000

H -0.846316000 2.957119000 -3.587438000

H -0.877946000 4.048679000 -2.188570000

H 0.341322000 4.277781000 -3.452059000

H 4.536737000 0.879621000 1.880967000

H 5.416380000 -1.122559000 -1.543159000

H 4.522462000 0.355885000 -1.940969000

H 5.704111000 0.364918000 -0.619839000

H 4.331874000 -2.348457000 0.648991000

H -0.320999000 2.172433000 0.039364000

H 1.129021000 1.631912000 2.951653000

H -1.778808000 -2.140061000 1.972362000

H -3.981251000 3.206283000 1.913092000

H -2.900598000 2.142793000 2.831726000

H -2.480508000 3.849582000 2.606127000

H -0.067237000 4.158112000 1.107978000

H -2.967343000 3.560847000 -0.675372000

H 1.281898000 -2.869665000 3.466207000

H 0.237255000 -2.416846000 4.812782000

H -0.408819000 -3.420294000 3.495519000

H -4.422136000 -1.692869000 -2.399970000

H -3.607303000 -3.261357000 -2.535663000

H -4.736923000 -2.969347000 -1.204275000

H -0.228989000 -5.166180000 -0.364287000

H 1.197212000 -4.158204000 -0.760712000

H 0.413872000 -4.043209000 0.815613000

H 1.342913000 -2.657329000 -2.572709000

H 0.539838000 -1.241010000 -3.251942000

H -3.786692000 -1.578240000 0.927627000

H -4.289720000 -0.496566000 -0.361325000

-----------------------------------------------------------------------------------

**R3**

----------------------------------------------------------------------------------

Coordinates (Angstroms)

X Y Z

-----------------------------------------------------------------------------------

C 2.678600000 2.602035000 -0.739721000

O 3.627291000 2.273937000 0.173083000

C 3.736368000 0.980781000 0.555417000

C 3.023521000 -0.014423000 0.006531000

C 2.094823000 0.268555000 -1.067152000

C 1.926101000 1.662363000 -1.350030000

C 3.088115000 -1.414721000 0.530742000

C 3.046340000 -2.403145000 -0.628251000

C 1.800857000 -2.112394000 -1.486993000

C 1.424957000 -0.747481000 -1.730647000

C 2.596969000 4.066261000 -0.968489000

O 1.238090000 -3.095390000 -1.984286000

O 4.227095000 -1.573179000 1.359332000

C 4.296283000 -2.337075000 -1.509826000

O 2.919615000 -3.704130000 -0.071629000

C -0.948402000 2.185665000 1.046646000

C -0.005112000 1.837777000 2.214338000

C 0.328740000 0.354363000 2.102797000

C -0.932306000 -0.446000000 2.141062000

C -2.057622000 0.043315000 1.372963000

C -2.010966000 1.265761000 0.722508000

C -1.011051000 -1.616229000 2.789281000

O -2.114664000 -2.405808000 2.771449000

C -3.183729000 -2.011271000 2.032817000

C -3.180458000 -0.849048000 1.345917000

O -0.770213000 3.273976000 0.493208000

C -0.649143000 2.208956000 3.551329000

O 1.238572000 -0.098444000 3.087713000

O 1.199931000 2.571203000 2.054717000

C -4.297687000 -2.990657000 2.088510000

C -1.002571000 -0.201497000 -2.329959000

C -1.528481000 1.189031000 -2.237786000

C -2.959101000 1.156676000 -1.705771000

C -3.244720000 -0.338951000 -1.741045000

C -1.993029000 -1.077509000 -2.041191000

C -3.913685000 1.922143000 -2.622974000

O -4.335818000 -0.852123000 -1.590139000

C -1.980786000 -2.561000000 -2.047883000

O -0.940237000 2.186403000 -2.599481000

C 0.391726000 -0.487472000 -2.811009000

C -3.056215000 1.729586000 -0.258127000

H 4.458200000 0.847475000 1.345453000

H 1.179180000 1.994497000 -2.053816000

H 2.178459000 -1.594761000 1.120420000

H 2.443944000 4.588785000 -0.020936000

H 3.530770000 4.438151000 -1.399667000

H 1.773559000 4.299081000 -1.640239000

H 4.182992000 -2.466504000 1.725253000

H 4.211185000 -3.074189000 -2.309567000

H 4.432324000 -1.350452000 -1.955783000

H 5.173132000 -2.571008000 -0.905820000

H 2.289425000 -4.155468000 -0.661469000

H 0.762105000 0.219505000 1.106056000

H -0.211857000 -2.046856000 3.371347000

H -4.068856000 -0.601023000 0.789033000

H -1.580219000 1.668532000 3.727410000

H 0.046700000 1.978114000 4.358722000

H -0.859593000 3.279411000 3.565028000

H 2.064054000 0.385233000 2.949308000

H 0.957915000 3.288400000 1.440421000

H -3.955689000 -3.968509000 1.739031000

H -4.647961000 -3.112530000 3.117053000

H -5.125869000 -2.660452000 1.464595000

H -3.627210000 2.973676000 -2.661334000

H -3.893331000 1.521834000 -3.638925000

H -4.934612000 1.845326000 -2.246271000

H -1.013846000 -2.961129000 -2.342028000

H -2.220456000 -2.932702000 -1.046410000

H -2.764866000 -2.938234000 -2.710155000

H 0.361640000 -1.370963000 -3.449087000

H 0.706124000 0.357517000 -3.427041000

H -4.064718000 1.509362000 0.101491000

H -2.969945000 2.811948000 -0.347853000

-----------------------------------------------------------------------------------

**R4**

----------------------------------------------------------------------------------

Coordinates (Angstroms)

X Y Z

-----------------------------------------------------------------------------------

C 3.338264000 2.437389000 -0.359960000

O 4.155448000 1.560391000 0.284039000

C 3.827804000 0.242859000 0.276060000

C 2.785971000 -0.251374000 -0.405625000

C 1.943480000 0.628198000 -1.187926000

C 2.252526000 2.021825000 -1.043454000

C 2.414225000 -1.699179000 -0.343780000

C 2.048648000 -2.183350000 -1.744426000

C 0.921412000 -1.287669000 -2.290400000

C 0.949268000 0.122736000 -2.009076000

C 3.803770000 3.840812000 -0.221430000

O 0.076883000 -1.837574000 -3.005069000

O 3.456083000 -2.451321000 0.252939000

C 3.238381000 -2.157443000 -2.707360000

O 1.559330000 -3.512278000 -1.630695000

C -2.799583000 -0.898882000 1.329238000

C -1.978512000 -2.196198000 1.333006000

C -0.976089000 -2.135874000 2.481516000

C -0.168854000 -0.872625000 2.421422000

C -0.816465000 0.351196000 1.988131000

C -2.109245000 0.358545000 1.498983000

C 1.103730000 -0.849191000 2.842656000

O 1.844124000 0.284606000 2.937085000

C 1.255184000 1.468552000 2.617870000

C -0.008026000 1.528975000 2.153152000

O -4.009984000 -1.001967000 1.122730000

C -1.309435000 -2.355919000 -0.030407000

O -0.110864000 -3.259597000 2.516360000

O -2.845503000 -3.293044000 1.577023000

C 2.152353000 2.624865000 2.870616000

C -1.351033000 1.161320000 -1.950201000

C -1.478911000 2.172285000 -0.872688000

C -2.882206000 2.112219000 -0.275438000

C -3.559092000 1.118999000 -1.216424000

C -2.539097000 0.539974000 -2.133564000

C -3.566899000 3.478931000 -0.354649000

O -4.747063000 0.892865000 -1.272919000

C -2.916181000 -0.502455000 -3.120039000

O -0.620271000 2.969774000 -0.547441000

C -0.073793000 0.983357000 -2.722296000

C -2.878149000 1.619184000 1.199473000

H 4.496902000 -0.346958000 0.881596000

H 1.626837000 2.771061000 -1.498120000

H 1.506471000 -1.785398000 0.263709000

H 3.894161000 4.113411000 0.832567000

H 4.791374000 3.957791000 -0.676404000

H 3.107828000 4.522102000 -0.707332000

H 3.127179000 -3.356013000 0.339773000

H 2.918407000 -2.518620000 -3.685706000

H 3.651922000 -1.154216000 -2.822349000

H 4.019933000 -2.815289000 -2.326480000

H 0.783753000 -3.536718000 -2.219381000

H -1.575707000 -2.101619000 3.403308000

H 1.657054000 -1.720355000 3.155399000

H -0.389259000 2.497595000 1.872217000

H -2.074843000 -2.439618000 -0.801700000

H -0.678360000 -1.501136000 -0.261848000

H -0.696327000 -3.255378000 -0.041159000

H -0.673582000 -4.041505000 2.596797000

H -3.735623000 -2.934874000 1.403883000

H 3.149127000 2.432776000 2.473544000

H 1.746663000 3.527022000 2.417391000

H 2.255811000 2.787940000 3.947840000

H -3.019480000 4.206839000 0.245832000

H -3.607432000 3.843077000 -1.383599000

H -4.588192000 3.403667000 0.021110000

H -2.044408000 -1.041902000 -3.482739000

H -3.621078000 -1.202802000 -2.667685000

H -3.436295000 -0.044138000 -3.968330000

H -0.303604000 0.517444000 -3.679868000

H 0.340520000 1.972407000 -2.924638000

H -3.922941000 1.452878000 1.468831000

H -2.512949000 2.443297000 1.813267000

-----------------------------------------------------------------------------------

**R5**

----------------------------------------------------------------------------------

Coordinates (Angstroms)

X Y Z

-----------------------------------------------------------------------------------

C -3.502575000 2.190451000 -1.366353000

O -4.378841000 1.294389000 -1.905644000

C -4.531275000 0.097537000 -1.290442000

C -3.824959000 -0.283162000 -0.216711000

C -2.824039000 0.602854000 0.341208000

C -2.769267000 1.897033000 -0.274164000

C -4.126527000 -1.573456000 0.495664000

C -2.819945000 -2.214596000 0.983404000

C -1.996593000 -1.181017000 1.806036000

C -2.007539000 0.204924000 1.383901000

C -3.443298000 3.452031000 -2.144808000

O -1.330799000 -1.578559000 2.762147000

O -5.044545000 -1.351706000 1.569187000

C -3.077855000 -3.469420000 1.789562000

O -2.064768000 -2.616374000 -0.168317000

C 0.718720000 0.548499000 -1.629960000

C 0.296344000 -0.882881000 -2.002708000

C 0.830647000 -1.813414000 -0.907050000

C 2.321347000 -1.647206000 -0.838715000

C 2.859735000 -0.305206000 -0.867722000

C 2.036576000 0.782727000 -1.120920000

C 3.135742000 -2.696946000 -0.661239000

O 4.476283000 -2.578339000 -0.495551000

C 5.016610000 -1.333668000 -0.426927000

C 4.262227000 -0.225294000 -0.582767000

O -0.116752000 1.441615000 -1.818498000

C 0.793313000 -1.267596000 -3.394185000

O 0.482419000 -3.166648000 -1.091396000

O -1.132947000 -0.900469000 -2.009241000

C 6.478458000 -1.372754000 -0.171873000

C 0.242791000 1.469021000 1.732171000

C 0.583011000 2.664184000 0.907941000

C 2.084376000 2.670222000 0.621180000

C 2.559366000 1.602427000 1.598334000

C 1.386345000 0.852947000 2.115118000

C 2.701430000 4.038039000 0.894412000

O 3.709682000 1.407440000 1.931759000

C 1.592461000 -0.334999000 2.978742000

O -0.187585000 3.550134000 0.598879000

C -1.165520000 1.188531000 2.180842000

C 2.415566000 2.210367000 -0.835940000

H -5.298005000 -0.501019000 -1.761909000

H -2.066868000 2.639095000 0.073154000

H -4.621438000 -2.276022000 -0.175668000

H -2.727252000 4.138323000 -1.697302000

H -3.136484000 3.242132000 -3.173233000

H -4.427304000 3.927215000 -2.183405000

H -4.683329000 -0.657567000 2.137748000

H -2.132534000 -3.895784000 2.120764000

H -3.688182000 -3.250987000 2.663874000

H -3.601996000 -4.196482000 1.166082000

H -1.902312000 -1.862834000 -0.778966000

H 0.421706000 -1.448884000 0.044828000

H 2.804193000 -3.722062000 -0.617987000

H 4.753892000 0.730316000 -0.496131000

H 1.881448000 -1.241819000 -3.462043000

H 0.450868000 -2.276879000 -3.624640000

H 0.380885000 -0.576938000 -4.131126000

H -0.389479000 -3.280348000 -0.672216000

H -1.373975000 0.048007000 -2.046237000

H 6.681874000 -1.882425000 0.773843000

H 6.987328000 -1.930194000 -0.962874000

H 6.885701000 -0.364647000 -0.126611000

H 2.320012000 4.770908000 0.182042000

H 2.462920000 4.385891000 1.901752000

H 3.786774000 3.982598000 0.798989000

H 0.653101000 -0.761818000 3.318540000

H 2.141704000 -1.100308000 2.420760000

H 2.223699000 -0.069989000 3.831719000

H -1.119546000 0.801692000 3.199813000

H -1.682721000 2.149472000 2.214030000

H 3.483523000 2.374965000 -0.984195000

H 1.880579000 2.873470000 -1.516177000

-----------------------------------------------------------------------------------

**R6**

----------------------------------------------------------------------------------

Coordinates (Angstroms)

X Y Z

-----------------------------------------------------------------------------------

C -3.312813000 -2.409300000 -1.594918000

O -4.322281000 -1.953256000 -0.807704000

C -4.183543000 -0.740785000 -0.217319000

C -3.136328000 0.071109000 -0.424313000

C -2.092736000 -0.317384000 -1.352806000

C -2.230832000 -1.651273000 -1.866852000

C -2.990309000 1.348164000 0.347544000

C -2.338873000 2.428275000 -0.508567000

C -1.057755000 1.877109000 -1.156582000

C -1.066865000 0.545449000 -1.694949000

C -3.566112000 -3.787654000 -2.084882000

O -0.106856000 2.660498000 -1.255561000

O -4.251542000 1.744344000 0.869123000

C -3.267469000 2.932576000 -1.617957000

O -1.987452000 3.505713000 0.350281000

C 1.135486000 -2.146138000 1.831013000

C 0.068582000 -1.669366000 2.830690000

C -0.566638000 -0.403745000 2.270502000

C 0.480458000 0.626600000 1.981754000

C 1.733091000 0.178996000 1.410854000

C 2.005782000 -1.165080000 1.230216000

C 0.237707000 1.936379000 2.132950000

O 1.115589000 2.905549000 1.773964000

C 2.294617000 2.538717000 1.210384000

C 2.619841000 1.241554000 1.031577000

O 1.224524000 -3.362642000 1.650597000

C 0.700343000 -1.460625000 4.208574000

O -1.564836000 0.137203000 3.121427000

O -0.949272000 -2.656046000 2.916400000

C 3.128663000 3.709811000 0.843143000

C 1.343207000 -0.160691000 -2.161771000

C 1.615394000 -1.504049000 -1.590336000

C 3.066364000 -1.556226000 -1.104358000

C 3.585957000 -0.203969000 -1.572723000

C 2.479822000 0.571584000 -2.183333000

C 3.834406000 -2.691272000 -1.786686000

O 4.732354000 0.183468000 -1.457977000

C 2.699189000 1.942307000 -2.712880000

O 0.833158000 -2.431920000 -1.582782000

C 0.005347000 0.215767000 -2.716377000

C 3.176862000 -1.692337000 0.445691000

H -5.009640000 -0.509516000 0.436059000

H -1.446213000 -2.089754000 -2.460954000

H -2.311662000 1.153633000 1.181681000

H -3.673138000 -4.474003000 -1.240623000

H -4.496947000 -3.821568000 -2.657547000

H -2.746111000 -4.125561000 -2.715430000

H -4.081825000 2.472235000 1.481240000

H -2.752331000 3.691975000 -2.208165000

H -3.582375000 2.125151000 -2.281256000

H -4.153718000 3.377191000 -1.166047000

H -1.102373000 3.776028000 0.044710000

H -1.015096000 -0.697468000 1.311161000

H -0.674630000 2.348519000 2.529275000

H 3.588241000 1.028476000 0.608976000

H 1.480455000 -0.698301000 4.189465000

H -0.071254000 -1.153003000 4.914850000

H 1.136027000 -2.400394000 4.550920000

H -2.247562000 -0.541375000 3.213808000

H -0.535652000 -3.454929000 2.540680000

H 3.328753000 4.327094000 1.722971000

H 4.073612000 3.385964000 0.411390000

H 2.598248000 4.331612000 0.117209000

H 3.369445000 -3.645940000 -1.537778000

H 3.833969000 -2.577257000 -2.873226000

H 4.870099000 -2.699597000 -1.443422000

H 3.702388000 2.283623000 -2.458795000

H 2.601692000 1.959687000 -3.802720000

H 1.953600000 2.624511000 -2.304147000

H 0.133295000 1.090170000 -3.356185000

H -0.337783000 -0.602363000 -3.351915000

H 4.116625000 -1.221371000 0.746806000

H 3.259699000 -2.753792000 0.671162000

-----------------------------------------------------------------------------------

**R7**

----------------------------------------------------------------------------------

Coordinates (Angstroms)

X Y Z

-----------------------------------------------------------------------------------

C -4.305311000 2.091786000 -0.520454000

O -5.031538000 1.025690000 -0.945344000

C -4.563696000 -0.218907000 -0.685959000

C -3.463077000 -0.467578000 0.041352000

C -2.717340000 0.636084000 0.608649000

C -3.187421000 1.933294000 0.217675000

C -2.945457000 -1.879042000 0.168427000

C -2.240363000 -2.082114000 1.507352000

C -1.296332000 -0.906492000 1.838157000

C -1.642116000 0.427318000 1.456607000

C -4.890319000 3.381563000 -0.964792000

O -0.293911000 -1.197436000 2.504958000

O -3.931670000 -2.862189000 -0.103843000

C -3.222741000 -2.236127000 2.671934000

O -1.427690000 -3.257647000 1.410487000

C 0.614162000 0.234270000 -2.105185000

C 0.199344000 -1.245073000 -2.249638000

C 0.562894000 -1.951783000 -0.943601000

C 2.033106000 -1.772922000 -0.686804000

C 2.604390000 -0.458962000 -0.890289000

C 1.862423000 0.559026000 -1.464439000

C 2.785757000 -2.767699000 -0.199473000

O 4.092608000 -2.620190000 0.138944000

C 4.651263000 -1.385764000 0.041486000

C 3.958475000 -0.328914000 -0.432464000

O -0.144991000 1.072530000 -2.600759000

C 0.874478000 -1.878547000 -3.467560000

O 0.169165000 -3.305956000 -0.927053000

O -1.207493000 -1.278620000 -2.428274000

C 6.062479000 -1.372569000 0.503353000

C 0.458240000 1.882355000 1.448080000

C 0.528905000 2.711745000 0.215492000

C 1.989613000 2.837622000 -0.221622000

C 2.702229000 2.259727000 0.995277000

C 1.708072000 1.632472000 1.900656000

C 2.375676000 4.297010000 -0.457646000

O 3.895895000 2.326734000 1.210761000

C 2.137833000 0.918683000 3.130803000

O -0.410407000 3.276208000 -0.302917000

C -0.847097000 1.545453000 2.104730000

C 2.299105000 1.999415000 -1.499989000

H -5.169916000 -0.982863000 -1.147506000

H -2.627987000 2.815804000 0.479639000

H -2.204868000 -2.004203000 -0.622623000

H -4.283413000 4.215087000 -0.616800000

H -4.947614000 3.412494000 -2.056062000

H -5.907099000 3.491377000 -0.577699000

H -4.645478000 -2.767586000 0.541183000

H -2.673064000 -2.308110000 3.611297000

H -3.905738000 -1.386042000 2.734712000

H -3.799050000 -3.153775000 2.546161000

H -0.683343000 -3.069464000 2.014288000

H 0.046947000 -1.400615000 -0.151835000

H 2.424580000 -3.767956000 -0.020053000

H 4.464060000 0.622364000 -0.469855000

H 1.962497000 -1.877750000 -3.386775000

H 0.529626000 -2.908812000 -3.563905000

H 0.589714000 -1.328144000 -4.365708000

H -0.466504000 -3.414361000 -0.194718000

H -1.429207000 -0.365572000 -2.691436000

H 6.480540000 -0.370959000 0.424029000

H 6.121527000 -1.702296000 1.544096000

H 6.665265000 -2.061243000 -0.094902000

H 3.435486000 4.368469000 -0.706363000

H 1.789332000 4.707340000 -1.280660000

H 2.191539000 4.904439000 0.431321000

H 3.109376000 0.449312000 2.968725000

H 2.261326000 1.626309000 3.957764000

H 1.409543000 0.163223000 3.417751000

H -0.650066000 1.258371000 3.137923000

H -1.450009000 2.454963000 2.130130000

H 3.372932000 2.084339000 -1.681815000

H 1.786287000 2.490889000 -2.326677000

-----------------------------------------------------------------------------------

**R8**

----------------------------------------------------------------------------------

Coordinates (Angstroms)

X Y Z

-----------------------------------------------------------------------------------

C 5.638309000 -1.793361000 0.117980000

O 6.190010000 -0.864149000 -0.704951000

C 5.441290000 0.213615000 -1.057523000

C 4.224411000 0.455872000 -0.553014000

C 3.647148000 -0.433671000 0.427939000

C 4.412116000 -1.625849000 0.656864000

C 3.355511000 1.561023000 -1.048981000

C 2.626062000 2.252039000 0.108970000

C 1.879625000 1.188871000 0.935967000

C 2.453788000 -0.122288000 1.053273000

C 6.540151000 -2.954508000 0.330114000

O 0.840020000 1.500945000 1.538232000

O 4.099294000 2.480176000 -1.826330000

C 3.575207000 3.016186000 1.027847000

O 1.738935000 3.203603000 -0.453688000

C -1.270785000 1.053081000 -0.850499000

C -1.928725000 2.304357000 -0.234993000

C -2.915828000 1.856253000 0.849316000

C -3.911485000 0.906738000 0.275346000

C -3.401643000 -0.130474000 -0.591137000

C -2.077650000 -0.135352000 -1.008046000

C -5.213850000 0.952868000 0.588330000

O -6.118074000 0.047647000 0.136923000

C -5.673117000 -0.998615000 -0.606587000

C -4.374314000 -1.121372000 -0.952388000

O -0.109296000 1.131177000 -1.268188000

C -2.609843000 3.102196000 -1.346722000

O -3.556430000 2.955510000 1.465095000

O -0.987521000 3.173496000 0.364233000

C -6.769256000 -1.934242000 -0.964769000

C 0.457531000 -1.612092000 1.126066000

C 0.514505000 -2.063171000 -0.290361000

C -0.895071000 -2.426653000 -0.756098000

C -1.644100000 -2.427546000 0.573391000

C -0.796897000 -1.775023000 1.602408000

C -0.913668000 -3.787465000 -1.445010000

O -2.734529000 -2.918851000 0.781383000

C -1.332348000 -1.460936000 2.953221000

O 1.515180000 -2.177480000 -0.966644000

C 1.662264000 -1.113721000 1.868766000

C -1.469475000 -1.320838000 -1.709731000

H 5.933552000 0.828398000 -1.794447000

H 4.040716000 -2.411607000 1.296011000

H 2.571351000 1.093329000 -1.662820000

H 7.491701000 -2.623215000 0.754524000

H 6.083078000 -3.676714000 1.003992000

H 6.757673000 -3.443294000 -0.623442000

H 3.484555000 3.198246000 -2.034864000

H 3.001006000 3.489859000 1.824442000

H 4.318912000 2.353724000 1.472511000

H 4.093384000 3.787237000 0.457167000

H 0.966278000 2.716346000 -0.800592000

H -2.323679000 1.301374000 1.594273000

H -5.664325000 1.696047000 1.227259000

H -4.094748000 -1.985798000 -1.531857000

H -1.860142000 3.412467000 -2.074948000

H -3.375934000 2.517973000 -1.856900000

H -3.075784000 3.990870000 -0.920094000

H -2.845981000 3.578624000 1.678294000

H -0.302862000 2.648393000 0.838060000

H -7.227655000 -2.342159000 -0.059819000

H -7.550063000 -1.409800000 -1.522061000

H -6.388877000 -2.754546000 -1.570457000

H -0.353003000 -3.741285000 -2.379907000

H -0.462707000 -4.557991000 -0.815617000

H -1.941150000 -4.082248000 -1.663091000

H -1.141319000 -2.284554000 3.648841000

H -0.869568000 -0.563024000 3.363664000

H -2.413115000 -1.323823000 2.906166000

H 1.337541000 -0.656820000 2.803947000

H 2.275047000 -1.977133000 2.135588000

H -2.208667000 -1.803580000 -2.349100000

H -0.655097000 -0.987409000 -2.352888000

-----------------------------------------------------------------------------------

**(7*R*,8*S*,7'*R*,8'*S*,15*S*)-3:**

**S1**

----------------------------------------------------------------------------------

Coordinates (Angstroms)

X Y Z

-----------------------------------------------------------------------------------

C -3.317354000 2.467934000 0.339824000

O -4.282195000 1.676057000 0.880063000

C -4.389935000 0.396782000 0.438173000

C -3.552571000 -0.150493000 -0.454695000

C -2.434243000 0.615347000 -0.965864000

C -2.412823000 1.984285000 -0.536377000

C -3.819122000 -1.499691000 -1.050924000

C -2.510269000 -2.244855000 -1.290219000

C -1.584807000 -1.347159000 -2.132965000

C -1.516010000 0.060683000 -1.841875000

C -3.419028000 3.875581000 0.804242000

O -0.926056000 -1.907121000 -3.016221000

O -4.725629000 -2.224095000 -0.238019000

C -1.816802000 -2.634771000 0.011257000

O -2.813332000 -3.412939000 -2.038898000

C 3.242458000 -0.774451000 0.833811000

C 2.788118000 -2.055535000 1.550272000

C 1.267746000 -2.127696000 1.486212000

C 0.678076000 -0.877355000 2.055978000

C 1.271591000 0.387354000 1.671099000

C 2.476903000 0.437353000 0.994767000

C -0.404791000 -0.904753000 2.843753000

O -1.022485000 0.213689000 3.300590000

C -0.573286000 1.422808000 2.870593000

C 0.503869000 1.536178000 2.066683000

O 4.294560000 -0.842155000 0.194525000

C 3.322439000 -2.057276000 2.984785000

O 0.736928000 -3.265534000 2.139887000

O 3.299845000 -3.176240000 0.843662000

C -1.384525000 2.537487000 3.420294000

C 0.875065000 1.035246000 -2.138724000

C 1.269332000 2.147957000 -1.239889000

C 2.772431000 2.101250000 -0.986163000

C 3.196779000 1.018888000 -1.973867000

C 1.979177000 0.342911000 -2.506406000

C 3.427977000 3.441676000 -1.319987000

O 4.322662000 0.813383000 -2.365908000

C 2.114046000 -0.835066000 -3.395444000

O 0.525298000 3.004971000 -0.800215000

C -0.533000000 0.889392000 -2.647686000

C 3.096207000 1.711602000 0.484406000

H -5.238818000 -0.111231000 0.867812000

H -1.635229000 2.648083000 -0.880151000

H -4.261269000 -1.333578000 -2.044807000

H -3.545698000 3.921402000 1.886601000

H -2.530219000 4.435614000 0.519407000

H -4.294022000 4.352532000 0.352026000

H -4.911654000 -3.052376000 -0.700229000

H -0.912144000 -3.196838000 -0.215486000

H -1.552957000 -1.760116000 0.602830000

H -2.481471000 -3.266317000 0.600650000

H -2.123992000 -3.440408000 -2.727325000

H 1.008364000 -2.154078000 0.418135000

H -0.892267000 -1.805609000 3.180202000

H 0.788524000 2.525734000 1.746160000

H 3.013573000 -2.977217000 3.481620000

H 4.412404000 -2.016248000 2.962640000

H 2.951236000 -1.207538000 3.560177000

H 1.096821000 -4.039705000 1.687008000

H 4.054723000 -2.818859000 0.342009000

H -1.254082000 2.596910000 4.504811000

H -1.084982000 3.484787000 2.977052000

H -2.444389000 2.361910000 3.227813000

H 4.509702000 3.363067000 -1.204668000

H 3.215525000 3.740666000 -2.348758000

H 3.054180000 4.219205000 -0.652317000

H 1.152857000 -1.191633000 -3.755143000

H 2.773027000 -0.594892000 -4.234513000

H 2.603719000 -1.645849000 -2.846119000

H -0.933434000 1.897648000 -2.769204000

H -0.483390000 0.438824000 -3.639900000

H 2.805071000 2.557504000 1.109320000

H 4.181625000 1.618806000 0.546233000

-----------------------------------------------------------------------------------

**S2**

----------------------------------------------------------------------------------

Coordinates (Angstroms)

X Y Z

-----------------------------------------------------------------------------------

C -1.875580000 -2.461096000 2.514298000

O -2.382201000 -3.419165000 1.688498000

C -2.889713000 -3.025436000 0.495095000

C -2.991148000 -1.747115000 0.109642000

C -2.578961000 -0.686248000 1.003802000

C -1.957379000 -1.150860000 2.215104000

C -3.371027000 -1.420368000 -1.308201000

C -4.143759000 -0.100979000 -1.377011000

C -3.481192000 1.007928000 -0.523144000

C -2.778037000 0.638086000 0.683594000

C -1.250457000 -3.049152000 3.726329000

O -3.674924000 2.184348000 -0.834166000

O -2.206677000 -1.400904000 -2.136982000

C -4.365076000 0.351900000 -2.808230000

O -5.400697000 -0.398161000 -0.737689000

C 0.897870000 -0.359121000 -0.986136000

C 1.122818000 -1.876278000 -1.105622000

C 2.173997000 -2.291909000 -0.075209000

C 3.416404000 -1.476398000 -0.230773000

C 3.262460000 -0.055532000 -0.452995000

C 2.021160000 0.496148000 -0.707597000

C 4.637846000 -2.009947000 -0.094866000

O 5.780389000 -1.276877000 -0.137005000

C 5.683514000 0.073331000 -0.257894000

C 4.489437000 0.687569000 -0.391934000

O -0.222567000 0.114059000 -1.230695000

C 1.536301000 -2.202633000 -2.543229000

O 2.474524000 -3.673203000 -0.143120000

O -0.029014000 -2.617895000 -0.735712000

C 7.014063000 0.732378000 -0.232190000

C -1.089250000 2.445073000 1.084188000

C 0.231357000 1.795527000 1.273048000

C 1.304525000 2.619054000 0.567939000

C 0.521021000 3.884250000 0.230134000

C -0.923075000 3.651003000 0.496426000

C 2.490312000 2.887785000 1.489712000

O 0.998406000 4.917116000 -0.192422000

C -1.927256000 4.686474000 0.147343000

O 0.439990000 0.811667000 1.954219000

C -2.344624000 1.789469000 1.567707000

C 1.750329000 1.970966000 -0.784370000

H -3.177311000 -3.870960000 -0.114142000

H -1.503005000 -0.452298000 2.897411000

H -4.016122000 -2.202198000 -1.712343000

H -0.426381000 -3.709271000 3.441486000

H -0.867459000 -2.265057000 4.376708000

H -1.977700000 -3.649806000 4.279391000

H -1.562932000 -0.733879000 -1.791132000

H -4.946995000 1.273413000 -2.817825000

H -3.418331000 0.542436000 -3.313000000

H -4.906394000 -0.422005000 -3.356048000

H -5.912668000 0.421634000 -0.722134000

H 1.740458000 -2.048696000 0.906389000

H 4.833000000 -3.057646000 0.071298000

H 4.486869000 1.761927000 -0.488148000

H 1.731227000 -3.271678000 -2.627726000

H 0.728505000 -1.934786000 -3.226829000

H 2.432920000 -1.657129000 -2.841446000

H 1.625499000 -4.133513000 -0.089597000

H -0.769465000 -2.395729000 -1.328852000

H 6.909501000 1.810731000 -0.336447000

H 7.527897000 0.511830000 0.707385000

H 7.639606000 0.354146000 -1.045281000

H 3.199370000 3.559723000 1.003945000

H 2.163736000 3.353477000 2.422424000

H 2.995516000 1.954905000 1.739727000

H -1.962125000 4.816035000 -0.938220000

H -2.925036000 4.421053000 0.485831000

H -1.632740000 5.651490000 0.568936000

H -2.175326000 1.439128000 2.586633000

H -3.146788000 2.526504000 1.597234000

H 2.618899000 2.530842000 -1.131553000

H 0.954653000 2.124268000 -1.513242000

-----------------------------------------------------------------------------------

**S3**

----------------------------------------------------------------------------------

Coordinates (Angstroms)

X Y Z

-----------------------------------------------------------------------------------

C -5.048435000 -1.719144000 -1.249839000

O -5.512379000 -0.602114000 -1.878358000

C -4.928067000 0.585102000 -1.585008000

C -3.973987000 0.736921000 -0.657396000

C -3.511677000 -0.404278000 0.103922000

C -4.082950000 -1.655844000 -0.312231000

C -3.276315000 2.055705000 -0.483784000

C -2.961999000 2.289793000 0.994760000

C -2.232900000 1.063809000 1.592116000

C -2.601622000 -0.252511000 1.129368000

C -5.728295000 -2.948566000 -1.731168000

O -1.441289000 1.239243000 2.522434000

O -2.099275000 2.098362000 -1.290131000

C -2.193773000 3.578109000 1.223493000

O -4.252921000 2.357385000 1.628806000

C 1.053379000 0.565276000 -0.973763000

C 1.442777000 1.994792000 -0.556540000

C 2.793357000 2.339685000 -1.190435000

C 3.815350000 1.309688000 -0.838401000

C 3.410386000 -0.075492000 -0.882644000

C 2.083020000 -0.431523000 -1.071086000

C 5.084736000 1.635221000 -0.555657000

O 6.051792000 0.715248000 -0.316100000

C 5.736767000 -0.601785000 -0.415882000

C 4.482943000 -1.009895000 -0.706280000

O -0.144103000 0.273544000 -1.122110000

C 1.492884000 2.065410000 0.973337000

O 3.245500000 3.629454000 -0.823050000

O 0.563766000 2.978644000 -1.081648000

C 6.904286000 -1.478246000 -0.145165000

C -0.608369000 -1.746148000 1.400616000

C -0.389929000 -2.410586000 0.092064000

C 1.105128000 -2.647443000 -0.110294000

C 1.672138000 -2.150094000 1.215845000

C 0.573944000 -1.578206000 2.035262000

C 1.363655000 -4.146096000 -0.295524000

O 2.828768000 -2.248157000 1.574869000

C 0.841650000 -0.988263000 3.373334000

O -1.259144000 -2.790618000 -0.664014000

C -1.986234000 -1.410883000 1.884227000

C 1.662098000 -1.854997000 -1.328464000

H -5.318212000 1.385541000 -2.197702000

H -3.739877000 -2.583540000 0.113800000

H -3.915284000 2.870520000 -0.828218000

H -5.570199000 -3.071550000 -2.806168000

H -5.343046000 -3.824964000 -1.213457000

H -6.806398000 -2.878567000 -1.562452000

H -1.574500000 1.271522000 -1.194066000

H -1.999043000 3.709625000 2.287994000

H -1.235433000 3.575480000 0.708315000

H -2.786508000 4.419974000 0.860216000

H -4.100663000 2.506944000 2.571444000

H 2.636259000 2.293819000 -2.278659000

H 5.460009000 2.644757000 -0.500618000

H 4.297058000 -2.071009000 -0.724852000

H 1.786795000 3.072660000 1.268999000

H 0.516835000 1.840635000 1.398783000

H 2.217102000 1.358955000 1.381763000

H 2.531720000 4.240912000 -1.050505000

H -0.366222000 2.696901000 -1.021834000

H 6.624080000 -2.525963000 -0.235454000

H 7.714157000 -1.261029000 -0.846736000

H 7.284868000 -1.297904000 0.863848000

H 2.436657000 -4.339877000 -0.334641000

H 0.938987000 -4.728177000 0.525701000

H 0.907430000 -4.486874000 -1.226344000

H 0.131395000 -0.193553000 3.594422000

H 0.763730000 -1.754636000 4.152151000

H 1.859175000 -0.597447000 3.413013000

H -2.607283000 -2.302386000 1.783683000

H -1.941175000 -1.156414000 2.942716000

H 0.882780000 -1.864112000 -2.093528000

H 2.505393000 -2.415218000 -1.729896000

-----------------------------------------------------------------------------------

**S4**

----------------------------------------------------------------------------------

Coordinates (Angstroms)

X Y Z

-----------------------------------------------------------------------------------

C 2.603967000 1.765849000 2.206478000

O 3.426854000 2.568266000 1.483389000

C 4.071841000 2.044358000 0.412381000

C 3.896043000 0.784104000 -0.010208000

C 2.943905000 -0.074970000 0.660299000

C 2.354751000 0.491374000 1.837915000

C 4.735621000 0.197290000 -1.105459000

C 3.904886000 -0.752448000 -1.964534000

C 3.240642000 -1.790512000 -1.042919000

C 2.665518000 -1.348931000 0.196267000

C 2.059761000 2.456668000 3.402840000

O 3.204120000 -2.957082000 -1.453921000

O 5.347378000 1.230358000 -1.857930000

C 2.837610000 -0.022981000 -2.783779000

O 4.793755000 -1.426897000 -2.842827000

C -1.421645000 1.128228000 1.272059000

C -0.979167000 2.123396000 0.189401000

C -2.225213000 2.852072000 -0.308604000

C -3.235959000 1.853705000 -0.788452000

C -3.409311000 0.628810000 -0.032644000

C -2.570649000 0.302536000 1.020180000

C -4.004441000 2.099757000 -1.858545000

O -4.984123000 1.263887000 -2.284437000

C -5.238908000 0.141384000 -1.560958000

C -4.514170000 -0.176561000 -0.468543000

O -0.734774000 1.064939000 2.296238000

C -0.239949000 1.389202000 -0.929926000

O -1.939815000 3.791146000 -1.329580000

O -0.107981000 3.077811000 0.778288000

C -6.354550000 -0.651283000 -2.136780000

C 0.343093000 -2.228932000 0.845820000

C -0.518114000 -2.048690000 2.045821000

C -1.987652000 -2.145277000 1.635483000

C -1.862692000 -2.389127000 0.135943000

C -0.429897000 -2.368252000 -0.255714000

C -2.625462000 -3.352007000 2.335031000

O -2.781709000 -2.633600000 -0.619382000

C -0.033791000 -2.559883000 -1.673568000

O -0.112187000 -1.911373000 3.180399000

C 1.834101000 -2.336186000 0.983576000

C -2.803041000 -0.861606000 1.947756000

H 4.748183000 2.751670000 -0.040971000

H 1.658248000 -0.076030000 2.435861000

H 5.508644000 -0.423922000 -0.628832000

H 1.636213000 3.425706000 3.126354000

H 1.294717000 1.848369000 3.878592000

H 2.864051000 2.650757000 4.118750000

H 5.928922000 0.800746000 -2.499461000

H 2.274082000 -0.748936000 -3.371261000

H 2.146686000 0.537362000 -2.155004000

H 3.329591000 0.672035000 -3.464327000

H 4.511720000 -2.358800000 -2.797075000

H -2.651232000 3.367810000 0.565136000

H -3.924213000 2.980618000 -2.475575000

H -4.741307000 -1.106184000 0.026524000

H 0.113500000 2.117864000 -1.659497000

H 0.617376000 0.865366000 -0.511960000

H -0.880253000 0.668917000 -1.439174000

H -1.315268000 4.425885000 -0.953224000

H 0.061310000 2.716417000 1.667200000

H -6.530554000 -1.548462000 -1.546636000

H -7.270376000 -0.054561000 -2.165019000

H -6.119014000 -0.941955000 -3.164121000

H -3.634362000 -3.512420000 1.952089000

H -2.045097000 -4.262219000 2.168592000

H -2.678028000 -3.170981000 3.409804000

H 0.115691000 -1.587265000 -2.152818000

H 0.898280000 -3.115324000 -1.765332000

H -0.831919000 -3.069301000 -2.214534000

H 2.069483000 -2.270900000 2.046857000

H 2.127478000 -3.334368000 0.647760000

H -2.539374000 -0.559606000 2.963420000

H -3.858090000 -1.134442000 1.956289000

-----------------------------------------------------------------------------------

**S5**

----------------------------------------------------------------------------------

Coordinates (Angstroms)

X Y Z

-----------------------------------------------------------------------------------

C -1.896864000 -2.407483000 2.542888000

O -2.376081000 -3.381967000 1.718263000

C -2.876155000 -3.007292000 0.516321000

C -2.987591000 -1.734764000 0.114194000

C -2.596658000 -0.656392000 1.001509000

C -1.993117000 -1.101877000 2.229866000

C -3.376100000 -1.423819000 -1.307345000

C -4.164672000 -0.108557000 -1.366559000

C -3.431049000 1.015639000 -0.595458000

C -2.787501000 0.663711000 0.655845000

C -1.281548000 -2.974700000 3.769459000

O -3.495865000 2.174975000 -0.994346000

O -2.215155000 -1.399577000 -2.142545000

C -4.484261000 0.297215000 -2.787766000

O -5.429621000 -0.312852000 -0.705476000

C 0.892716000 -0.368545000 -0.986127000

C 1.114411000 -1.885848000 -1.110227000

C 2.161458000 -2.307012000 -0.077895000

C 3.406674000 -1.494850000 -0.228956000

C 3.257627000 -0.073350000 -0.450128000

C 2.018494000 0.482799000 -0.706155000

C 4.626201000 -2.032284000 -0.090894000

O 5.771000000 -1.302708000 -0.129507000

C 5.678657000 0.047874000 -0.249693000

C 4.486766000 0.665823000 -0.386153000

O -0.226880000 0.107740000 -1.228268000

C 1.531324000 -2.208946000 -2.547563000

O 2.458162000 -3.688967000 -0.147970000

O -0.040770000 -2.625639000 -0.746590000

C 7.011125000 0.702846000 -0.220050000

C -1.085941000 2.464145000 1.061663000

C 0.223342000 1.798472000 1.263883000

C 1.312398000 2.609285000 0.568652000

C 0.549782000 3.886841000 0.230218000

C -0.899906000 3.671762000 0.483437000

C 2.497005000 2.857962000 1.497274000

O 1.046534000 4.914689000 -0.181766000

C -1.894637000 4.713075000 0.123845000

O 0.414322000 0.811631000 1.946268000

C -2.359690000 1.829522000 1.524073000

C 1.753989000 1.958780000 -0.783565000

H -3.147049000 -3.862499000 -0.087162000

H -1.559103000 -0.390522000 2.912187000

H -4.017362000 -2.213077000 -1.702477000

H -0.443118000 -3.624142000 3.502589000

H -0.920496000 -2.178943000 4.418237000

H -2.007468000 -3.582231000 4.316700000

H -1.569972000 -0.732773000 -1.798994000

H -5.042826000 1.231343000 -2.785442000

H -3.571628000 0.434970000 -3.365105000

H -5.086611000 -0.480667000 -3.261799000

H -5.265836000 -0.422956000 0.240941000

H 1.726197000 -2.064461000 0.903187000

H 4.817836000 -3.080789000 0.074281000

H 4.487739000 1.740205000 -0.481725000

H 1.724315000 -3.278161000 -2.634474000

H 0.725990000 -1.937576000 -3.232673000

H 2.429765000 -1.664429000 -2.841923000

H 1.607748000 -4.147095000 -0.098266000

H -0.778078000 -2.398057000 -1.341704000

H 6.910096000 1.781571000 -0.323891000

H 7.521755000 0.480165000 0.720772000

H 7.637691000 0.323236000 -1.031697000

H 3.219406000 3.519476000 1.017028000

H 2.172193000 3.327239000 2.428805000

H 2.986134000 1.916998000 1.748773000

H -2.235462000 4.557898000 -0.903258000

H -2.774662000 4.678530000 0.765086000

H -1.436135000 5.701716000 0.180079000

H -2.223998000 1.499129000 2.554939000

H -3.153068000 2.576912000 1.514013000

H 2.624946000 2.514556000 -1.131433000

H 0.958218000 2.115637000 -1.511661000

-----------------------------------------------------------------------------------

**S6**

----------------------------------------------------------------------------------

Coordinates (Angstroms)

X Y Z

-----------------------------------------------------------------------------------

C -5.039230000 -1.705557000 -1.274183000

O -5.494029000 -0.584899000 -1.905335000

C -4.911557000 0.599872000 -1.601891000

C -3.964746000 0.747754000 -0.665512000

C -3.513653000 -0.397921000 0.100560000

C -4.085853000 -1.647142000 -0.324372000

C -3.268704000 2.067155000 -0.473538000

C -2.974357000 2.284470000 1.016876000

C -2.219408000 1.064017000 1.591676000

C -2.611809000 -0.252435000 1.135055000

C -5.714977000 -2.931772000 -1.768365000

O -1.388314000 1.227555000 2.484164000

O -2.086042000 2.115719000 -1.272514000

C -2.236714000 3.580977000 1.270783000

O -4.225889000 2.391722000 1.721440000

C 1.056519000 0.574477000 -0.955224000

C 1.454699000 2.002561000 -0.540458000

C 2.801009000 2.341302000 -1.186906000

C 3.821807000 1.308228000 -0.840442000

C 3.411285000 -0.075296000 -0.879876000

C 2.081256000 -0.425985000 -1.061230000

C 5.094449000 1.629262000 -0.567229000

O 6.059315000 0.705760000 -0.332578000

C 5.738228000 -0.610092000 -0.426532000

C 4.480760000 -1.013744000 -0.707793000

O -0.143237000 0.286248000 -1.095603000

C 1.519557000 2.073888000 0.988688000

O 3.260935000 3.630142000 -0.826676000

O 0.575773000 2.990516000 -1.057865000

C 6.903799000 -1.490787000 -0.161246000

C -0.620927000 -1.749547000 1.403994000

C -0.401729000 -2.403474000 0.090615000

C 1.092767000 -2.643484000 -0.110404000

C 1.658973000 -2.156653000 1.219716000

C 0.559965000 -1.591324000 2.043600000

C 1.346774000 -4.142145000 -0.303089000

O 2.815450000 -2.256646000 1.578097000

C 0.828049000 -1.016895000 3.387966000

O -1.270772000 -2.774830000 -0.670229000

C -1.999751000 -1.414667000 1.886741000

C 1.654272000 -1.846838000 -1.323548000

H -5.292425000 1.403112000 -2.216910000

H -3.749390000 -2.576786000 0.102586000

H -3.905439000 2.884923000 -0.814555000

H -5.541583000 -3.051595000 -2.841334000

H -5.339016000 -3.810522000 -1.247905000

H -6.795248000 -2.859595000 -1.615229000

H -1.557158000 1.290906000 -1.175918000

H -2.038344000 3.686354000 2.335649000

H -1.288889000 3.607515000 0.738497000

H -2.852354000 4.418193000 0.935561000

H -4.670552000 1.534010000 1.693227000

H 2.634749000 2.293168000 -2.273731000

H 5.474225000 2.637355000 -0.516859000

H 4.290183000 -2.074114000 -0.722082000

H 1.825860000 3.078626000 1.280325000

H 0.545208000 1.858778000 1.422779000

H 2.240791000 1.360981000 1.391266000

H 2.545127000 4.242887000 -1.044239000

H -0.355319000 2.715829000 -0.985715000

H 7.709084000 -1.280253000 -0.870106000

H 7.293181000 -1.307958000 0.843939000

H 6.618117000 -2.537565000 -0.245037000

H 2.419240000 -4.339040000 -0.341131000

H 0.918760000 -4.727226000 0.514272000

H 0.891325000 -4.476542000 -1.236599000

H 0.759274000 -1.794313000 4.156627000

H 1.842963000 -0.619324000 3.428818000

H 0.114213000 -0.229623000 3.622261000

H -2.621743000 -2.305037000 1.781834000

H -1.955869000 -1.164368000 2.946285000

H 0.875549000 -1.849542000 -2.089363000

H 2.495465000 -2.408748000 -1.727026000

-----------------------------------------------------------------------------------

**S7**

----------------------------------------------------------------------------------

Coordinates (Angstroms)

X Y Z

-----------------------------------------------------------------------------------

C -3.062124000 2.021036000 -1.922328000

O -4.061026000 1.960774000 -1.003468000

C -4.269707000 0.792081000 -0.348662000

C -3.499375000 -0.292677000 -0.512075000

C -2.358926000 -0.244571000 -1.402863000

C -2.247621000 0.970650000 -2.153526000

C -3.824472000 -1.595539000 0.151988000

C -2.541055000 -2.267127000 0.631242000

C -1.582052000 -2.395956000 -0.565794000

C -1.472810000 -1.305795000 -1.494929000

C -2.969191000 3.357480000 -2.561095000

O -0.922089000 -3.439237000 -0.636441000

O -4.762362000 -1.393465000 1.194007000

C -1.857791000 -1.496812000 1.760115000

O -2.877993000 -3.570725000 1.084251000

C 1.701796000 2.685472000 0.467269000

C 0.454487000 2.885143000 1.343831000

C 0.705078000 2.256046000 2.711444000

C 1.131266000 0.828259000 2.554022000

C 2.049262000 0.499376000 1.480471000

C 2.367683000 1.402196000 0.487292000

C 0.729451000 -0.122272000 3.407330000

O 1.159246000 -1.410972000 3.351575000

C 2.122108000 -1.732958000 2.447490000

C 2.589366000 -0.830067000 1.561995000

O 2.039348000 3.633780000 -0.243114000

C -0.755378000 2.287925000 0.626217000

O -0.422787000 2.337020000 3.566293000

O 0.248504000 4.276780000 1.539562000

C 2.536304000 -3.155050000 2.549061000

C 0.988033000 -1.096758000 -2.154278000

C 1.504866000 0.301264000 -2.140116000

C 2.994639000 0.286705000 -1.796633000

C 3.232476000 -1.199145000 -1.567272000

C 1.987002000 -1.955329000 -1.846400000

C 3.801140000 0.726470000 -3.031440000

O 4.287691000 -1.699678000 -1.231262000

C 1.995476000 -3.438621000 -1.798483000

O 0.865599000 1.287820000 -2.440959000

C -0.415464000 -1.419924000 -2.576080000

C 3.405854000 1.159097000 -0.576078000

H -5.126450000 0.838843000 0.304733000

H -1.427616000 1.112219000 -2.838379000

H -4.252233000 -2.261540000 -0.612386000

H -2.819408000 4.127159000 -1.799225000

H -2.137717000 3.386919000 -3.262518000

H -3.896146000 3.594306000 -3.090588000

H -4.961640000 -2.265152000 1.560782000

H -0.965295000 -2.038841000 2.069304000

H -1.573898000 -0.488966000 1.461534000

H -2.536820000 -1.426709000 2.610170000

H -2.183295000 -4.140142000 0.706048000

H 1.547718000 2.809179000 3.152222000

H 0.031712000 0.037239000 4.213600000

H 3.368402000 -1.150083000 0.890454000

H -1.648606000 2.434376000 1.233473000

H -0.883113000 2.798535000 -0.326171000

H -0.631226000 1.223961000 0.432900000

H -0.624551000 3.276607000 3.669500000

H 0.787714000 4.694619000 0.843044000

H 2.843385000 -3.392729000 3.570542000

H 1.696515000 -3.808365000 2.295086000

H 3.360591000 -3.360652000 1.868731000

H 4.868699000 0.675159000 -2.811415000

H 3.596185000 0.087200000 -3.893345000

H 3.539255000 1.753365000 -3.288831000

H 2.332038000 -3.774499000 -0.813727000

H 1.013048000 -3.860404000 -1.985402000

H 2.719030000 -3.829027000 -2.520491000

H -0.673829000 -0.767611000 -3.411063000

H -0.435507000 -2.445418000 -2.947722000

H 3.692090000 2.137395000 -0.958550000

H 4.305991000 0.702687000 -0.156144000

-----------------------------------------------------------------------------------

**References**

1. Wang, H.-H.; Li, G.; Qiao, Y.-N.; Sun, Y.; Peng, X.-P.; Lou, H.-X. *Org. Lett.* **2019**, *21*, 3319-3322.
